# Supplementary material for: Comparison of subset selection methods in linear regression in the context of health-related quality of life and substance abuse in Russia
Source: PubMed Central journal article supplement (PMC4553217; doi:10.1186/s12874-015-0066-2), 2015-08-30

## Additional file 7: Bayesian model averaging

Table S7. BMA results: posterior inclusion probabilities, estimates of regression coefficients and credible intervals

| Variables          | Aggregate information |               |                 |             |                 | 100 best models |               |                 |             |                 |
|--------------------|-----------------------|---------------|-----------------|-------------|-----------------|-----------------|---------------|-----------------|-------------|-----------------|
|                    | PIP                   | Unconditional |                 | Conditional |                 | PIP             | Unconditional |                 | Conditional |                 |
|                    |                       | Beta          | 95% CI          | Beta        | 95% CI          |                 | Beta          | 95% CI          | Beta        | 95% CI          |
| sex                | 0.13                  |               |                 |             |                 | 0.00            |               |                 |             |                 |
| age.d              | 1.00                  | -4.62         | (-6.46 ; -2.78) | -4.62       | (-6.46 ; -2.78) | 1.00            | -4.58         | (-6.35 ; -2.81) | -4.58       | (-6.35 ; -2.81) |
| education          | 0.35                  |               |                 |             |                 | 0.19            |               |                 |             |                 |
| income.source      | 0.04                  |               |                 |             |                 | 0.00            |               |                 |             |                 |
| income.level       | 1.00                  | -5.03         | (-7.09 ; -2.96) | -5.03       | (-7.09 ; -2.97) | 1.00            | -5.05         | (-7.09 ; -3.01) | -5.05       | (-7.09 ; -3.01) |
| living.sit_1       | 0.09                  |               |                 |             |                 | 0.00            |               |                 |             |                 |
| living.sit_2       | 0.05                  |               |                 |             |                 | 0.00            |               |                 |             |                 |
| marital            | 0.04                  |               |                 |             |                 | 0.00            |               |                 |             |                 |
| CAGE               | 0.28                  |               |                 |             |                 | 0.00            |               |                 |             |                 |
| age.drug.use       | 0.81                  | -2.59         | (-5.68 ; 0.49)  | -3.21       | (-5.24 ; -1.18) | 0.99            | -3.22         | (-5.23 ; -1.2)  | -3.24       | (-5.19 ; -1.28) |
| main.drug_1        | 0.07                  |               |                 |             |                 | 0.00            |               |                 |             |                 |
| main.drug_2        | 0.07                  |               |                 |             |                 | 0.00            |               |                 |             |                 |
| poly.drug          | 0.58                  | -2.18         | (-6.37 ; 2.01)  | -3.76       | (-6.5 ; -1.02)  | 0.75            | -2.84         | (-6.79 ; 1.11)  | -3.80       | (-6.43 ; -1.17) |
| drug.freq.days     | 0.42                  |               |                 |             |                 | 0.33            |               |                 |             |                 |
| drug.freq.times    | 0.14                  |               |                 |             |                 | 0.00            |               |                 |             |                 |
| inject.used.recent | 0.61                  | -1.83         | (-5.16 ; 1.49)  | -3.00       | (-5.16 ; -0.85) | 0.58            | -1.69         | (-4.88 ; 1.51)  | -2.88       | (-4.94 ; -0.83) |
| inject.used.ever   | 0.07                  |               |                 |             |                 | 0.00            |               |                 |             |                 |
| get.unused.syr     | 0.04                  |               |                 |             |                 | 0.00            |               |                 |             |                 |
| overdose           | 0.05                  |               |                 |             |                 | 0.00            |               |                 |             |                 |
| MHI5               | 0.84                  | -2.74         | (-5.72 ; 0.25)  | -3.25       | (-5.29 ; -1.22) | 1.00            | -3.39         | (-5.33 ; -1.44) | -3.39       | (-5.33 ; -1.44) |
| sex.active         | 0.11                  |               |                 |             |                 | 0.00            |               |                 |             |                 |
| sell.sex.6m        | 0.04                  |               |                 |             |                 | 0.00            |               |                 |             |                 |
| pay.sex.6m         | 0.10                  |               |                 |             |                 | 0.00            |               |                 |             |                 |
| HIV.HC.partner_1   | 0.05                  |               |                 |             |                 | 0.00            |               |                 |             |                 |
| HIV.HC.partner_2   | 0.07                  |               |                 |             |                 | 0.00            |               |                 |             |                 |

| Variables             | Aggregate information |               |                  |             |                  | 100 best models |               |                 |             |                  |
|-----------------------|-----------------------|---------------|------------------|-------------|------------------|-----------------|---------------|-----------------|-------------|------------------|
|                       | PIP                   | Unconditional |                  | Conditional |                  | PIP             | Unconditional |                 | Conditional |                  |
|                       |                       | Beta          | 95% CI           | Beta        | 95% CI           |                 | Beta          | 95% CI          | Beta        | 95% CI           |
| HIV.test              | 0.20                  |               |                  |             |                  | 0.03            |               |                 |             |                  |
| HIV.status            | 0.17                  |               |                  |             |                  | 0.01            |               |                 |             |                  |
| HIV.care_1            | 0.05                  |               |                  |             |                  | 0.00            |               |                 |             |                  |
| HIV.care_2            | 1.00                  | -7.32         | (-10.05 ; -4.58) | -7.35       | (-9.92 ; -4.78)  | 1.00            | -7.55         | (-9.74 ; -5.36) | -7.55       | (-9.74 ; -5.36)  |
| TB                    | 0.26                  |               |                  |             |                  | 0.09            |               |                 |             |                  |
| HepC.treatment_1      | 0.77                  | -3.05         | (-7.06 ; 0.96)   | -3.96       | (-6.62 ; -1.29)  | 0.91            | -3.74         | (-7.04 ; -0.44) | -4.13       | (-6.55 ; -1.7)   |
| HepC.treatment_2      | 0.59                  | -3.51         | (-10.12 ; 3.1)   | -5.96       | (-10.21 ; -1.71) | 0.83            | -5.03         | (-10.8 ; 0.75)  | -6.07       | (-10.06 ; -2.08) |
| HepC.treatment_3      | 0.05                  |               |                  |             |                  | 0.00            |               |                 |             |                  |
| HepB.aware            | 0.05                  |               |                  |             |                  | 0.00            |               |                 |             |                  |
| HepB.vaccine          | 0.39                  |               |                  |             |                  | 0.66            | 1.89          | (-1.25 ; 5.02)  | 2.87        | (0.85 ; 4.89)    |
| incarceration         | 0.13                  |               |                  |             |                  | 0.00            |               |                 |             |                  |
| med.insurance         | 0.16                  |               |                  |             |                  | 0.01            |               |                 |             |                  |
| med.care.12m          | 0.09                  |               |                  |             |                  | 0.00            |               |                 |             |                  |
| detox_1               | 0.81                  | -3.99         | (-8.73 ; 0.75)   | -4.93       | (-8.09 ; -1.77)  | 0.90            | -4.36         | (-8.38 ; -0.33) | -4.83       | (-7.85 ; -1.81)  |
| detox_2               | 0.48                  |               |                  |             |                  | 0.42            |               |                 |             |                  |
| drug.treat.problems_1 | 0.11                  |               |                  |             |                  | 0.01            |               |                 |             |                  |
| drug.treat.problems_2 | 0.14                  |               |                  |             |                  | 0.00            |               |                 |             |                  |
| med.care.problems     | 0.53                  | -2.71         | (-8.5 ; 3.07)    | -5.17       | (-9.04 ; -1.29)  | 0.77            | -4.21         | (-9.85 ; 1.43)  | -5.50       | (-9.28 ; -1.71)  |
| police.confiscate.syr | 0.04                  |               |                  |             |                  | 0.00            |               |                 |             |                  |
| IDU.disclosure.close  | 0.05                  |               |                  |             |                  | 0.00            |               |                 |             |                  |
| IDU.disclosure.doctor | 0.04                  |               |                  |             |                  | 0.00            |               |                 |             |                  |
| IDU.stigma.internal   | 0.97                  | -3.94         | (-6.48 ; -1.41)  | -4.06       | (-6.24 ; -1.88)  | 1.00            | -3.71         | (-5.78 ; -1.65) | -3.71       | (-5.78 ; -1.65)  |
| IDU.stigma.conscious  | 0.06                  |               |                  |             |                  | 0.00            |               |                 |             |                  |

95% CI, 95% Credible Interval; PIP, posterior inclusion probability.

Conditional: coefficients and 95% CI are estimated by averaging over values conditional on inclusion in the model;

Unconditional: coefficients and 95% CI are estimated by averaging over values from all or 100 best models considered (the coefficient is considered 0 when a model does not include the variable).

Figure S7.1 Posterior model size distribution

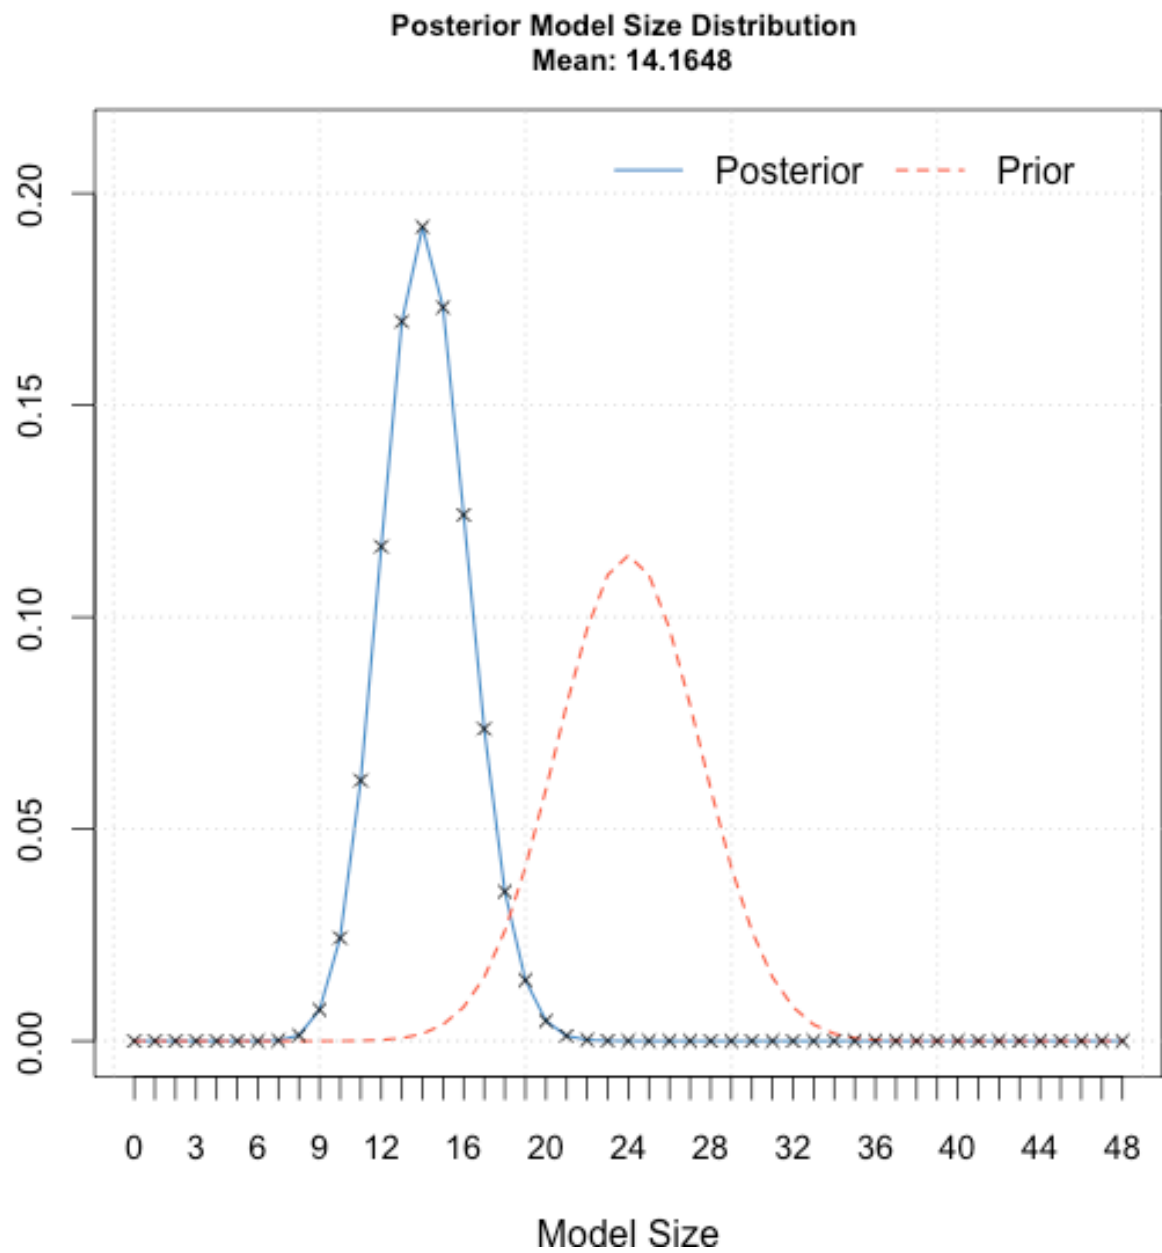

Figure S7.2 Posterior model probabilities (2,000 best subsets) and MCMC chain convergence

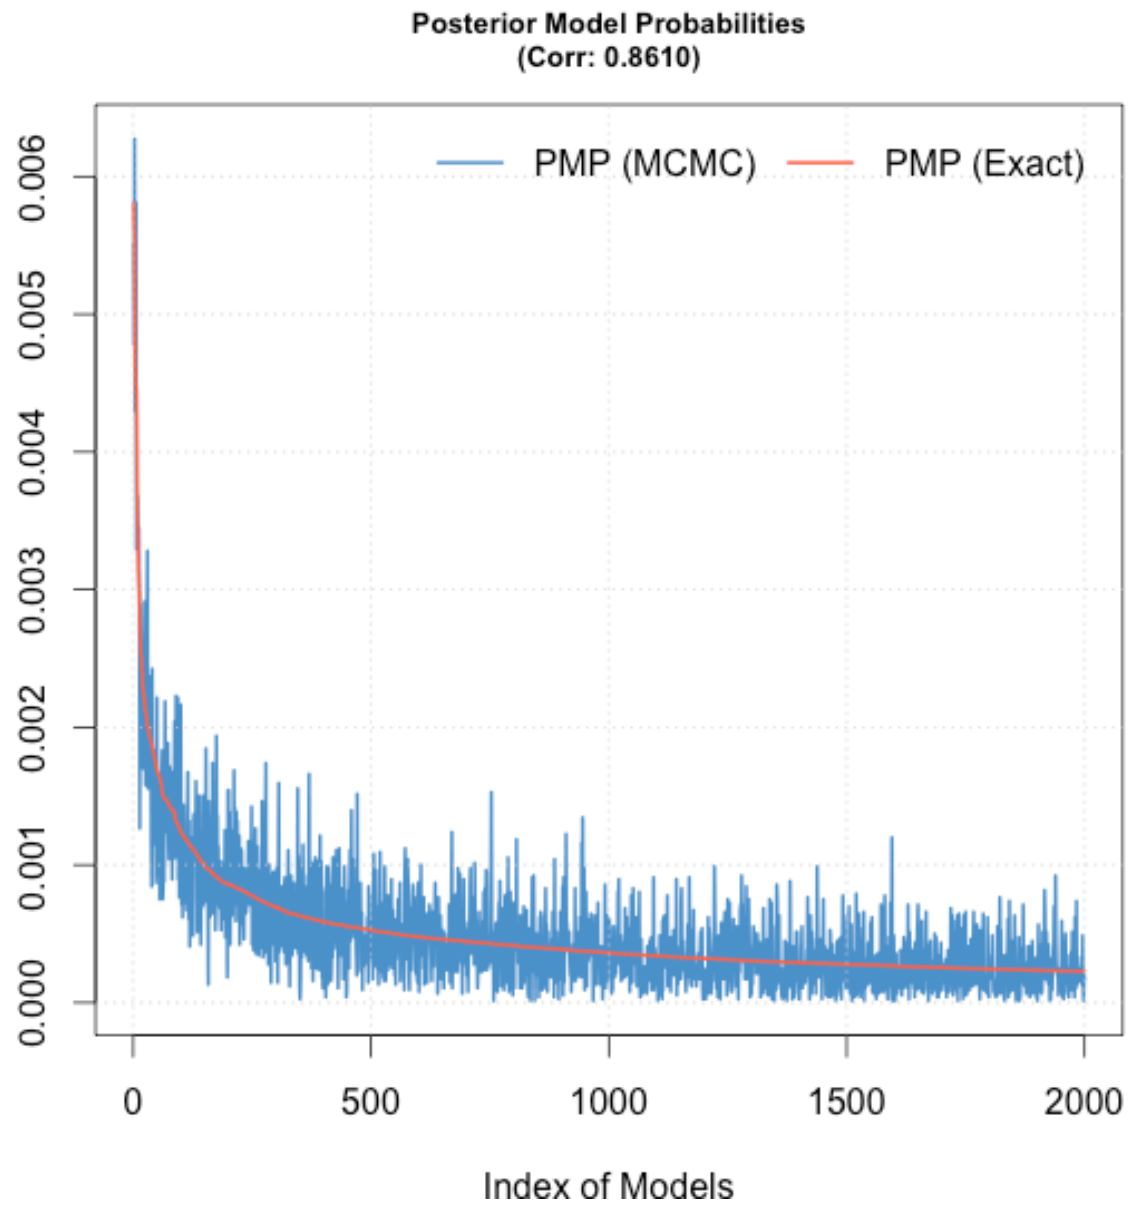

**Figure S7.3 Variables inclusion in 2,000 best models evaluated**

*Note: red color corresponds to negative coefficients, blue – to positive coefficients.*

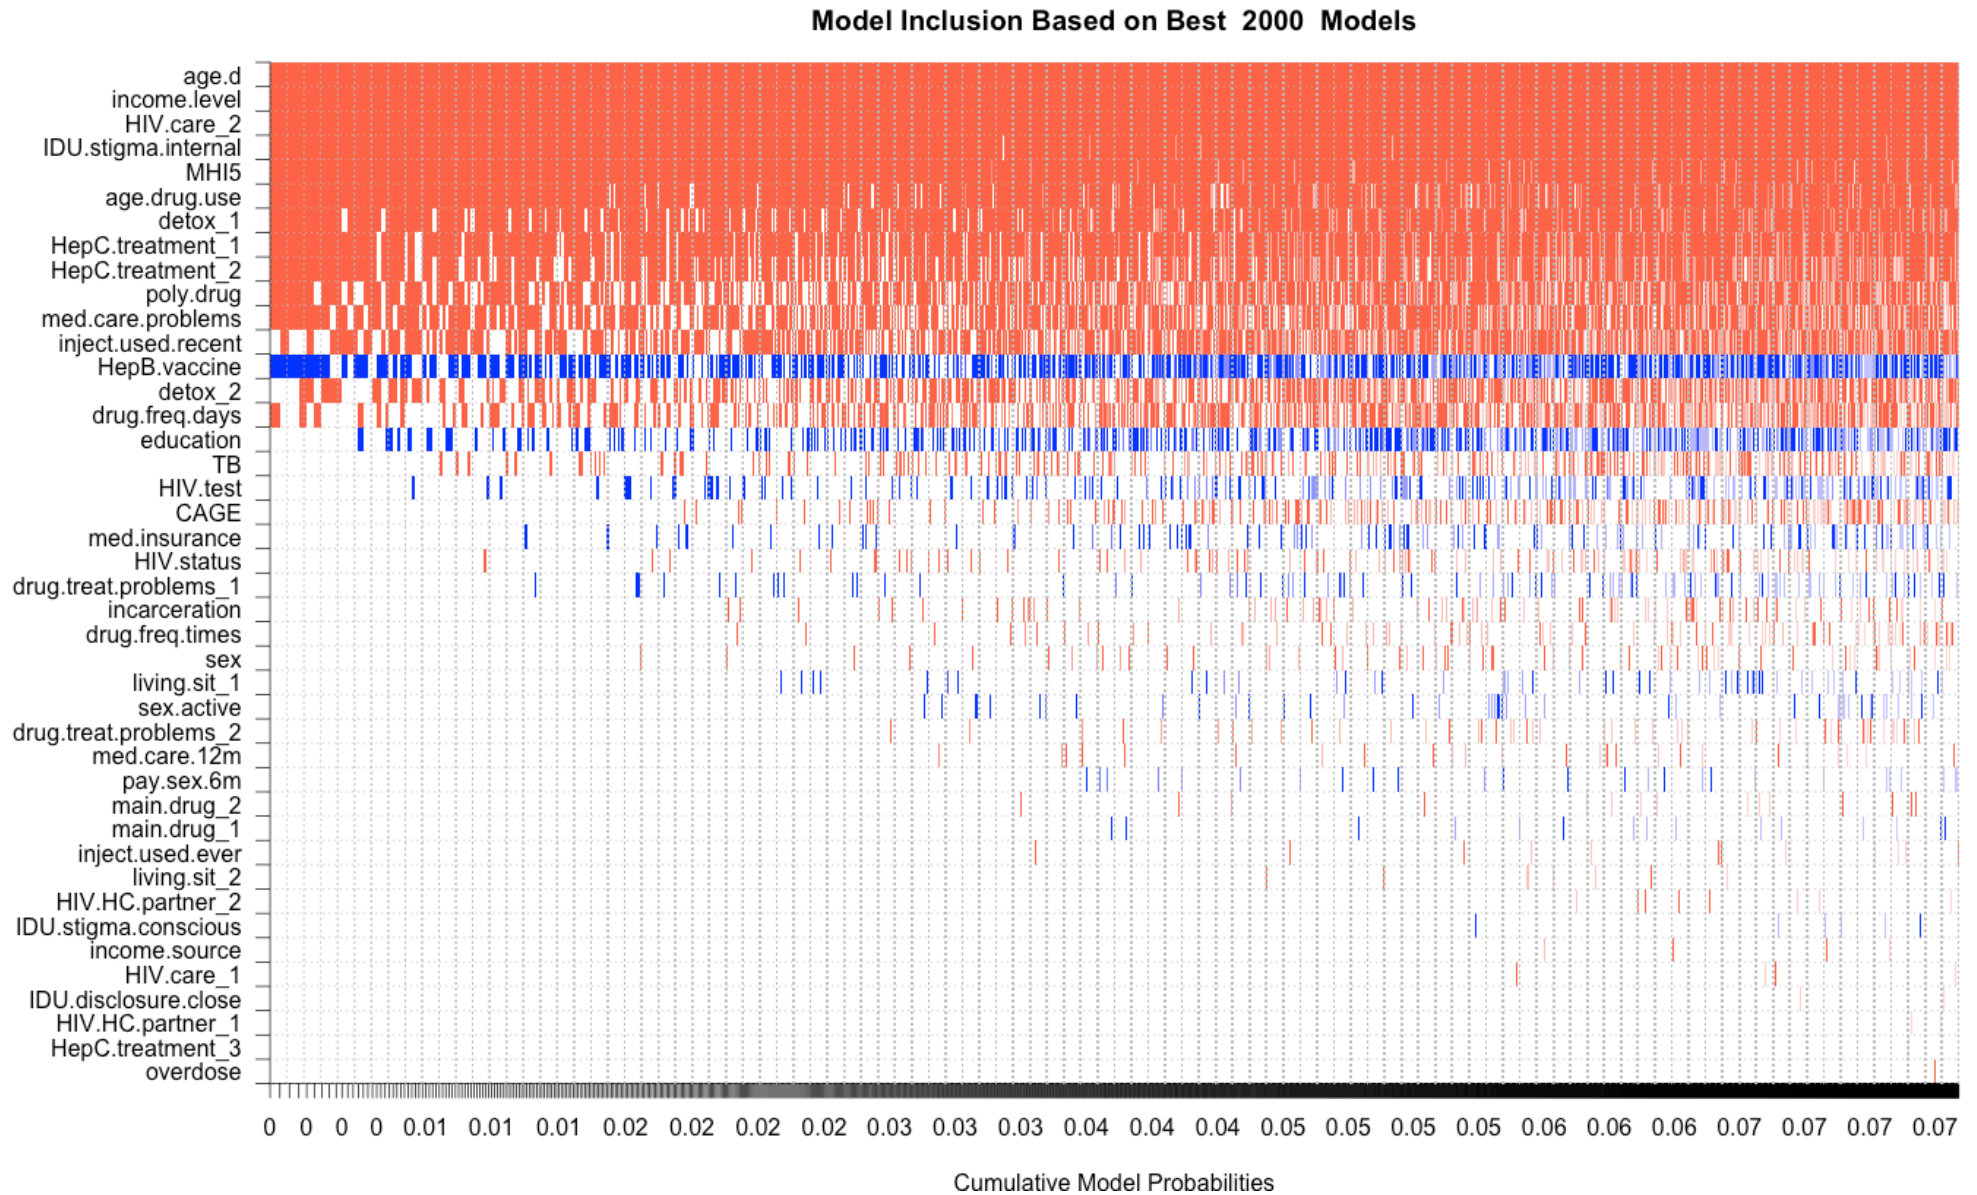

Supplement: 12874_2015_66_MOESM7_ESM.pdf [file 12874_2015_66_MOESM7_ESM.pdf]
