# Supplementary material for: Comparison of subset selection methods in linear regression in the context of health-related quality of life and substance abuse in Russia
Source: PubMed Central journal article supplement (PMC4553217; doi:10.1186/s12874-015-0066-2), 2015-08-30
Supplement: 12874_2015_66_MOESM2_ESM.pdf [file 12874_2015_66_MOESM2_ESM.pdf]

## Additional file 2: Variable codes

For simplicity we are using variable codes instead of full variable names throughout all Additional files. The following table provides reference for the codes used (“-“ denotes the reference category):

| Variable names                                                                                                | Variable codes                    | Variable names                                                                                                                                                                                           | Variable codes                                                |
|---------------------------------------------------------------------------------------------------------------|-----------------------------------|----------------------------------------------------------------------------------------------------------------------------------------------------------------------------------------------------------|---------------------------------------------------------------|
| <b>Sex:</b><br>Male<br>Female                                                                                 | -<br>sex                          | <b>Paid for sex in the last 6 months:</b><br>No<br>Yes                                                                                                                                                   | -<br>pay.sex.6m                                               |
| <b>Age (median = 32 y.o.):</b><br>Less than 32 y.o.<br>32 y.o. or older                                       | -<br>age.d                        | <b>HIV and Hepatitis C status of primary sexual partner:</b><br>HIV and HCV negative or unknown<br>Known to be HIV or HCV positive<br>No primary partner in the last 6 months                            | -<br>HIV.HC.partner_1<br>HIV.HC.partner_2                     |
| <b>Education:</b><br>Primary or Basic<br>Secondary, Vocational or at least some Higher                        | -<br>education                    | <b>Ever been tested for HIV:</b><br>No (or don't know)<br>Yes                                                                                                                                            | -<br>HIV.test                                                 |
| <b>Main source of income:</b><br>Legal source<br>Illegal source                                               | -<br>income.source                | <b>HIV status (based on study testing):</b><br>Negative<br>Positive                                                                                                                                      | -<br>HIV.status                                               |
| <b>Level of income:</b><br>Coping well<br>Coping is difficult (or very difficult)                             | -<br>income.level                 | <b>Receiving regular HIV care:</b><br>HIV-negative or unaware<br>HIV+; receives regular HIV care<br>HIV+; does not receive regular HIV care                                                              | -<br>HIV.care_1<br>HIV.care_2                                 |
| <b>Living arrangements:</b><br>Someone else's house<br>Owned or rented place<br>Shelter / no fixed place      | -<br>living.sit_1<br>living.sit_2 | <b>Tuberculosis history awareness:</b><br>No (or don't know)<br>Yes                                                                                                                                      | -<br>TB                                                       |
| <b>Marital status:</b><br>Not married<br>Married                                                              | -<br>marital                      | <b>Treatment of Hepatitis C:</b><br>Never diagnosed with HCV<br>HCV+, never been offered treatment<br>HCV+, was offered treatment, but did not receive it<br>HCV+, was offered treatment and received it | -<br>HepC.treatment_1<br>HepC.treatment_2<br>HepC.treatment_3 |
| <b>Alcohol abuse using CAGE scale:</b><br>CAGE = 0-1<br>CAGE = 2-4                                            | -<br>CAGE                         | <b>Hepatitis B history awareness:</b><br>No<br>Yes                                                                                                                                                       | -<br>HepB.aware                                               |
| <b>Age of first drug use (cannabis excluded; median = 16 y.o.):</b><br>17 y.o. or older<br>16 y.o. or younger | -<br>age.drug.use                 | <b>Ever vaccinated against Hepatitis B:</b><br>No (or don't know)<br>Yes (at least one dose)                                                                                                             | -<br>HepB.vaccine                                             |

| Variable names                                                                                                          | Variable codes                  | Variable names                                                                                                                                                  | Variable codes                                      |
|-------------------------------------------------------------------------------------------------------------------------|---------------------------------|-----------------------------------------------------------------------------------------------------------------------------------------------------------------|-----------------------------------------------------|
| <b>Main drug of use:</b><br>(Meth)-amphetamines<br>Methadone / Fentanyl<br>Heroin                                       | -<br>main.drug_1<br>main.drug_2 | <b>History of incarceration:</b><br>No<br>Yes                                                                                                                   | -<br>incarceration                                  |
| <b>Poly-drug use in the last 4 weeks:</b><br>Injected 1 class of drugs<br>Injected 2 or more classes of drugs           | -<br>poly.drug                  | <b>Having basic medical insurance:</b><br>No<br>Yes                                                                                                             | -<br>med.insurance                                  |
| <b>Frequency of injecting drugs (days during the last 4 weeks; median=20):</b><br>19 days or less<br>20 days or more    | -<br>drug.freq.days             | <b>Receiving any healthcare services in the last 12 months:</b><br>Received<br>Not received                                                                     | -<br>med.care.12m                                   |
| <b>Frequency of injecting drugs (times per day; median = 1):</b><br>One<br>Two or more                                  | -<br>drug.freq.times            | <b>Receiving detoxification services in the last 6 months:</b><br>Did not need detox services<br>Needed, but did not receive detox<br>Needed and received detox | -<br>detox_1<br>detox_2                             |
| <b>Used non-sterile injecting equipment at least once in the last 4 weeks:</b><br>No (or don't know)<br>Yes             | -<br>inject.used.recent         | <b>Ever had difficulties obtaining drug abuse treatment:</b><br>Never received treatment (or don't know)<br>Had no difficulties<br>Had difficulties             | -<br>drug.treat.problems_1<br>drug.treat.problems_2 |
| <b>Ever used non-sterile injecting equipment:</b><br>No<br>Yes                                                          | -<br>Inject.used.ever           | <b>Had difficulties obtaining medical care because of drug use:</b><br>No (or don't know)<br>Yes                                                                | -<br>med.care.problems                              |
| <b>Getting sterile injecting equipment (in last 4 weeks):</b><br>No<br>Yes                                              | -<br>get.unused.syr             | <b>Ever experienced police confiscate syringes:</b><br>No<br>Yes                                                                                                | -<br>police.confiscate.syr                          |
| <b>Ever overdosed:</b><br>No<br>Yes                                                                                     | -<br>overdose                   | <b>PWID status disclosure to family or friends:</b><br>Rather disclosed<br>Rather did not disclose                                                              | IDU.disclosure.close                                |
| <b>Mental health problems score:</b><br>Lower score on mental health problems<br>Higher score on mental health problems | -<br>MH15                       | <b>PWID status disclosure to a healthcare provider:</b><br>Rather disclosed<br>Rather did not disclose                                                          | -<br>IDU.disclosure.doctor                          |
| <b>Sexually active in the last 6 months:</b><br>No<br>Yes                                                               | -<br>sex.active                 | <b>Internalized PWID stigma:</b><br>Low<br>High                                                                                                                 | -<br>IDU.stigma.internal                            |
| <b>Involved in sexual work in the last 6 months:</b><br>No<br>Yes                                                       | -<br>sell.sex.6m                | <b>PWID stigma consciousness:</b><br>Low<br>High                                                                                                                | -<br>IDU.stigma.conscious                           |
