# Supplementary material for: Comparison of subset selection methods in linear regression in the context of health-related quality of life and substance abuse in Russia
Source: PubMed Central journal article supplement (PMC4553217; doi:10.1186/s12874-015-0066-2), 2015-08-30
Supplement: 12874_2015_66_MOESM3_ESM.pdf [file 12874_2015_66_MOESM3_ESM.pdf]

### Additional file 3: Stepwise regression

Note: Inclusion frequency is estimated using bootstrap (number of iterations = 2,000).

Table S3.1. Backward elimination regression using AIC

| Variables                     | Backward elimination, AIC |                        |                       |                        |
|-------------------------------|---------------------------|------------------------|-----------------------|------------------------|
|                               | Beta                      | 95% CI<br>(asymptotic) | 95% CI<br>(bootstrap) | Inclusion<br>frequency |
| (Intercept)                   | 79.57                     | (73.96 ; 85.18)        | (73.31 ; 85.83)       | 1.00                   |
| sex                           | -2.39                     | (-4.58 ; -0.2)         | (-4.41 ; -0.37)       | 0.86                   |
| age.d                         | -4.76                     | (-6.57 ; -2.95)        | (-6.47 ; -3.05)       | 1.00                   |
| education                     | 3.18                      | (-0.1 ; 6.47)          | (-0.66 ; 7.03)        | 0.72                   |
| income.source                 |                           |                        |                       | 0.16                   |
| income.level                  | -3.76                     | (-5.77 ; -1.74)        | (-5.86 ; -1.65)       | 0.99                   |
| living.sit_1                  | 1.42                      | (-0.51 ; 3.36)         | (-0.49 ; 3.34)        | 0.59                   |
| living.sit_2                  |                           |                        |                       | 0.20                   |
| marital                       |                           |                        |                       | 0.31                   |
| CAGE                          | -1.80                     | (-3.85 ; 0.25)         | (-3.88 ; 0.28)        | 0.62                   |
| age.drug.use                  | -3.40                     | (-5.36 ; -1.45)        | (-5.36 ; -1.44)       | 0.96                   |
| main.drug_1                   |                           |                        |                       | 0.29                   |
| main.drug_2                   |                           |                        |                       | 0.22                   |
| poly.drug                     | -3.61                     | (-6.24 ; -0.99)        | (-6.14 ; -1.09)       | 0.90                   |
| drug.freq.days                | -1.78                     | (-3.76 ; 0.2)          | (-3.92 ; 0.36)        | 0.50                   |
| drug.freq.times               |                           |                        |                       | 0.24                   |
| inject.used.recent            | -2.16                     | (-4.23 ; -0.09)        | (-4.53 ; 0.21)        | 0.71                   |
| inject.used.ever              |                           |                        |                       | 0.24                   |
| get.unused.syr                |                           |                        |                       | 0.23                   |
| overdose                      |                           |                        |                       | 0.20                   |
| MHI5                          | -2.62                     | (-4.58 ; -0.65)        | (-4.71 ; -0.52)       | 0.85                   |
| sex.active                    |                           |                        |                       | 0.36                   |
| sell.sex.6m                   |                           |                        |                       | 0.44                   |
| pay.sex.6m                    | 2.70                      | (-0.68 ; 6.08)         | (-0.25 ; 5.65)        | 0.46                   |
| HIV.HC.partner_1              | -2.08                     | (-4.86 ; 0.7)          | (-5.13 ; 0.98)        | 0.53                   |
| HIV.HC.partner_2              | -2.20                     | (-4.68 ; 0.29)         | (-4.88 ; 0.49)        | 0.53                   |
| HIV.test                      | 3.46                      | (-0.28 ; 7.2)          | (-0.48 ; 7.41)        | 0.66                   |
| HIV.status                    | -1.88                     | (-4.16 ; 0.39)         | (-4.2 ; 0.43)         | 0.63                   |
| HIV.care_1                    |                           |                        |                       | 0.37                   |
| HIV.care_2                    | -5.32                     | (-7.89 ; -2.75)        | (-8.03 ; -2.61)       | 0.86                   |
| TB                            | -3.39                     | (-6.91 ; 0.13)         | (-6.5 ; -0.27)        | 0.72                   |
| HepC.treatment_1              | -3.96                     | (-6.29 ; -1.63)        | (-6.38 ; -1.54)       | 0.96                   |
| HepC.treatment_2              | -6.42                     | (-10.39 ; -2.44)       | (-11.47 ; -1.37)      | 0.93                   |
| HepC.treatment_3              |                           |                        |                       | 0.32                   |
| HepB.aware                    |                           |                        |                       | 0.22                   |
| HepB.vaccine                  | 1.79                      | (-0.29 ; 3.88)         | (-0.33 ; 3.91)        | 0.60                   |
| incarceration                 | -1.52                     | (-3.44 ; 0.41)         | (-3.36 ; 0.33)        | 0.54                   |
| med.insurance                 |                           |                        |                       | 0.48                   |
| med.care.12m                  | -1.52                     | (-3.45 ; 0.4)          | (-3.44 ; 0.39)        | 0.51                   |
| detox_1                       | -5.57                     | (-8.55 ; -2.58)        | (-8.67 ; -2.46)       | 0.96                   |
| detox_2                       | -4.78                     | (-7.99 ; -1.57)        | (-7.75 ; -1.81)       | 0.94                   |
| drug.treat.problems_1         | 1.56                      | (-0.33 ; 3.44)         | (-0.37 ; 3.48)        | 0.48                   |
| drug.treat.problems_2         |                           |                        |                       | 0.30                   |
| med.care.problems             | -4.35                     | (-8.12 ; -0.58)        | (-8.02 ; -0.69)       | 0.79                   |
| police.confiscate.syr         |                           |                        |                       | 0.24                   |
| IDU.disclosure.close          |                           |                        |                       | 0.25                   |
| IDU.disclosure.doctor         |                           |                        |                       | 0.23                   |
| IDU.stigma.internal           | -3.94                     | (-5.97 ; -1.91)        | (-6.02 ; -1.86)       | 0.98                   |
| IDU.stigma.conscious          | 1.42                      | (-0.46 ; 3.31)         | (-0.56 ; 3.41)        | 0.56                   |
| <b>Adjusted R<sup>2</sup></b> | <b>0.38</b>               |                        |                       |                        |

**Table S3.2. Backward elimination regression using BIC**

| Variables                     | Backward elimination, BIC |                     |                    |                     |
|-------------------------------|---------------------------|---------------------|--------------------|---------------------|
|                               | Beta                      | 95% CI (asymptotic) | 95% CI (bootstrap) | Inclusion frequency |
| (Intercept)                   | 82.69                     | (79.84 ; 85.55)     | (79.99 ; 85.4)     | 1.00                |
| sex                           |                           |                     |                    | 0.31                |
| age.d                         | -4.49                     | (-6.24 ; -2.75)     | (-6.2 ; -2.79)     | 0.99                |
| education                     |                           |                     |                    | 0.39                |
| income.source                 |                           |                     |                    | 0.02                |
| income.level                  | -4.78                     | (-6.76 ; -2.81)     | (-6.81 ; -2.76)    | 0.96                |
| living.sit_1                  |                           |                     |                    | 0.13                |
| living.sit_2                  |                           |                     |                    | 0.03                |
| marital                       |                           |                     |                    | 0.03                |
| CAGE                          |                           |                     |                    | 0.33                |
| age.drug.use                  | -3.36                     | (-5.26 ; -1.46)     | (-5.25 ; -1.48)    | 0.76                |
| main.drug_1                   |                           |                     |                    | 0.08                |
| main.drug_2                   |                           |                     |                    | 0.05                |
| poly.drug                     | -3.70                     | (-6.29 ; -1.11)     | (-6.12 ; -1.28)    | 0.59                |
| drug.freq.days                |                           |                     |                    | 0.31                |
| drug.freq.times               |                           |                     |                    | 0.10                |
| inject.used.recent            | -2.61                     | (-4.6 ; -0.62)      | (-4.78 ; -0.44)    | 0.48                |
| inject.used.ever              |                           |                     |                    | 0.05                |
| get.unused.syr                |                           |                     |                    | 0.03                |
| overdose                      |                           |                     |                    | 0.03                |
| MHI5                          | -3.50                     | (-5.4 ; -1.6)       | (-5.56 ; -1.45)    | 0.61                |
| sex.active                    |                           |                     |                    | 0.13                |
| sell.sex.6m                   |                           |                     |                    | 0.06                |
| pay.sex.6m                    |                           |                     |                    | 0.14                |
| HIV.HC.partner_1              |                           |                     |                    | 0.21                |
| HIV.HC.partner_2              |                           |                     |                    | 0.20                |
| HIV.test                      |                           |                     |                    | 0.28                |
| HIV.status                    |                           |                     |                    | 0.34                |
| HIV.care_1                    |                           |                     |                    | 0.21                |
| HIV.care_2                    | -7.17                     | (-9.25 ; -5.09)     | (-9.43 ; -4.92)    | 0.80                |
| TB                            |                           |                     |                    | 0.30                |
| HepC.treatment_1              | -4.21                     | (-6.48 ; -1.95)     | (-6.62 ; -1.8)     | 0.77                |
| HepC.treatment_2              | -6.08                     | (-10.07 ; -2.09)    | (-10.89 ; -1.27)   | 0.63                |
| HepC.treatment_3              |                           |                     |                    | 0.04                |
| HepB.aware                    |                           |                     |                    | 0.03                |
| HepB.vaccine                  | 2.89                      | (0.9 ; 4.88)        | (0.85 ; 4.93)      | 0.33                |
| incarceration                 |                           |                     |                    | 0.17                |
| med.insurance                 |                           |                     |                    | 0.18                |
| med.care.12m                  |                           |                     |                    | 0.15                |
| detox_1                       | -4.41                     | (-7.28 ; -1.54)     | (-7.47 ; -1.34)    | 0.77                |
| detox_2                       |                           |                     |                    | 0.56                |
| drug.treat.problems_1         |                           |                     |                    | 0.16                |
| drug.treat.problems_2         |                           |                     |                    | 0.15                |
| med.care.problems             | -5.44                     | (-9.2 ; -1.69)      | (-9.29 ; -1.6)     | 0.46                |
| police.confiscate.syr         |                           |                     |                    | 0.04                |
| IDU.disclosure.close          |                           |                     |                    | 0.07                |
| IDU.disclosure.doctor         |                           |                     |                    | 0.04                |
| IDU.stigma.internal           | -3.36                     | (-5.34 ; -1.38)     | (-5.41 ; -1.3)     | 0.88                |
| IDU.stigma.conscious          |                           |                     |                    | 0.14                |
| <b>Adjusted R<sup>2</sup></b> | <b>0.35</b>               |                     |                    |                     |

**Table S3.3. Backward elimination regression using Likelihood Ratio Test (p=0.05)**

| Variables                     | Backward elimination, LRT (p=0.05) |                     |                    |                     |
|-------------------------------|------------------------------------|---------------------|--------------------|---------------------|
|                               | Beta                               | 95% CI (asymptotic) | 95% CI (bootstrap) | Inclusion frequency |
| (Intercept)                   | 77.57                              | (72.44 ; 82.71)     | (71.71 ; 83.43)    | 1.00                |
| sex                           | -2.43                              | (-4.59 ; -0.27)     | (-4.41 ; -0.44)    | 0.66                |
| age.d                         | -5.00                              | (-6.78 ; -3.22)     | (-6.73 ; -3.27)    | 1.00                |
| education                     | 3.49                               | (0.22 ; 6.77)       | (-0.42 ; 7.4)      | 0.56                |
| income.source                 |                                    |                     |                    | 0.06                |
| income.level                  | -4.58                              | (-6.54 ; -2.62)     | (-6.58 ; -2.59)    | 0.98                |
| living.sit_1                  |                                    |                     |                    | 0.35                |
| living.sit_2                  |                                    |                     |                    | 0.08                |
| marital                       |                                    |                     |                    | 0.13                |
| CAGE                          |                                    |                     |                    | 0.47                |
| age.drug.use                  | -3.53                              | (-5.43 ; -1.62)     | (-5.42 ; -1.64)    | 0.90                |
| main.drug_1                   |                                    |                     |                    | 0.14                |
| main.drug_2                   |                                    |                     |                    | 0.10                |
| poly.drug                     | -3.51                              | (-6.09 ; -0.92)     | (-5.96 ; -1.05)    | 0.79                |
| drug.freq.days                |                                    |                     |                    | 0.39                |
| drug.freq.times               |                                    |                     |                    | 0.14                |
| inject.used.recent            | -2.84                              | (-4.82 ; -0.87)     | (-5 ; -0.69)       | 0.59                |
| inject.used.ever              |                                    |                     |                    | 0.10                |
| get.unused.syr                |                                    |                     |                    | 0.09                |
| overdose                      |                                    |                     |                    | 0.09                |
| MHI5                          | -3.09                              | (-4.98 ; -1.2)      | (-5.12 ; -1.06)    | 0.75                |
| sex.active                    |                                    |                     |                    | 0.24                |
| sell.sex.6m                   |                                    |                     |                    | 0.22                |
| pay.sex.6m                    |                                    |                     |                    | 0.29                |
| HIV.HC.partner_1              |                                    |                     |                    | 0.34                |
| HIV.HC.partner_2              |                                    |                     |                    | 0.34                |
| HIV.test                      | 3.96                               | (0.3 ; 7.62)        | (0.15 ; 7.77)      | 0.49                |
| HIV.status                    |                                    |                     |                    | 0.48                |
| HIV.care_1                    |                                    |                     |                    | 0.26                |
| HIV.care_2                    | -7.32                              | (-9.42 ; -5.22)     | (-9.58 ; -5.06)    | 0.81                |
| TB                            | -4.06                              | (-7.56 ; -0.55)     | (-7.17 ; -0.94)    | 0.53                |
| HepC.treatment_1              | -4.39                              | (-6.66 ; -2.11)     | (-6.79 ; -1.99)    | 0.90                |
| HepC.treatment_2              | -6.61                              | (-10.58 ; -2.64)    | (-11.44 ; -1.78)   | 0.83                |
| HepC.treatment_3              |                                    |                     |                    | 0.14                |
| HepB.aware                    |                                    |                     |                    | 0.08                |
| HepB.vaccine                  | 2.34                               | (0.33 ; 4.36)       | (0.29 ; 4.4)       | 0.46                |
| incarceration                 |                                    |                     |                    | 0.34                |
| med.insurance                 |                                    |                     |                    | 0.31                |
| med.care.12m                  |                                    |                     |                    | 0.33                |
| detox_1                       | -5.52                              | (-8.4 ; -2.64)      | (-8.55 ; -2.48)    | 0.91                |
| detox_2                       | -4.06                              | (-7.23 ; -0.89)     | (-6.97 ; -1.14)    | 0.81                |
| drug.treat.problems_1         |                                    |                     |                    | 0.31                |
| drug.treat.problems_2         |                                    |                     |                    | 0.21                |
| med.care.problems             | -5.28                              | (-9.01 ; -1.54)     | (-8.97 ; -1.58)    | 0.64                |
| police.confiscate.syr         |                                    |                     |                    | 0.10                |
| IDU.disclosure.close          |                                    |                     |                    | 0.13                |
| IDU.disclosure.doctor         |                                    |                     |                    | 0.10                |
| IDU.stigma.internal           | -3.39                              | (-5.37 ; -1.42)     | (-5.41 ; -1.38)    | 0.94                |
| IDU.stigma.conscious          |                                    |                     |                    | 0.33                |
| <b>Adjusted R<sup>2</sup></b> | <b>0.37</b>                        |                     |                    |                     |

**Table S3.4. Forward selection regression using AIC**

| Variables                     | Forward selection, AIC |                        |                       |                        |
|-------------------------------|------------------------|------------------------|-----------------------|------------------------|
|                               | Beta                   | 95% CI<br>(asymptotic) | 95% CI<br>(bootstrap) | Inclusion<br>frequency |
| (Intercept)                   | 75.89                  | (70.15 ; 81.64)        | (69.19 ; 82.6)        | 1.00                   |
| sex                           | -2.59                  | (-4.76 ; -0.42)        | (-4.58 ; -0.6)        | 0.81                   |
| age.d                         | -4.82                  | (-6.64 ; -3.01)        | (-6.55 ; -3.1)        | 1.00                   |
| education                     | 2.97                   | (-0.31 ; 6.25)         | (-0.83 ; 6.76)        | 0.70                   |
| income.source                 |                        |                        |                       | 0.15                   |
| income.level                  | -3.88                  | (-5.88 ; -1.89)        | (-5.91 ; -1.85)       | 0.99                   |
| living.sit_1                  | 1.49                   | (-0.44 ; 3.41)         | (-0.41 ; 3.39)        | 0.56                   |
| living.sit_2                  |                        |                        |                       | 0.20                   |
| marital                       |                        |                        |                       | 0.23                   |
| CAGE                          | -1.68                  | (-3.71 ; 0.36)         | (-3.75 ; 0.4)         | 0.60                   |
| age.drug.use                  | -3.37                  | (-5.33 ; -1.41)        | (-5.32 ; -1.42)       | 0.95                   |
| main.drug_1                   |                        |                        |                       | 0.16                   |
| main.drug_2                   |                        |                        |                       | 0.18                   |
| poly.drug                     | -3.66                  | (-6.29 ; -1.03)        | (-6.22 ; -1.1)        | 0.90                   |
| drug.freq.days                | -1.91                  | (-3.88 ; 0.07)         | (-4.05 ; 0.23)        | 0.55                   |
| drug.freq.times               |                        |                        |                       | 0.24                   |
| inject.used.recent            | -2.47                  | (-4.52 ; -0.42)        | (-4.81 ; -0.12)       | 0.73                   |
| inject.used.ever              |                        |                        |                       | 0.23                   |
| get.unused.syr                |                        |                        |                       | 0.20                   |
| overdose                      |                        |                        |                       | 0.19                   |
| MHI5                          | -2.76                  | (-4.71 ; -0.82)        | (-4.84 ; -0.68)       | 0.86                   |
| sex.active                    | 1.50                   | (-0.58 ; 3.58)         | (-0.64 ; 3.64)        | 0.43                   |
| sell.sex.6m                   |                        |                        |                       | 0.35                   |
| pay.sex.6m                    |                        |                        |                       | 0.41                   |
| HIV.HC.partner_1              |                        |                        |                       | 0.37                   |
| HIV.HC.partner_2              |                        |                        |                       | 0.32                   |
| HIV.test                      | 3.48                   | (-0.23 ; 7.2)          | (-0.39 ; 7.36)        | 0.65                   |
| HIV.status                    | -1.93                  | (-4.17 ; 0.32)         | (-4.16 ; 0.31)        | 0.55                   |
| HIV.care_1                    |                        |                        |                       | 0.26                   |
| HIV.care_2                    | -5.60                  | (-8.16 ; -3.05)        | (-8.31 ; -2.89)       | 1.00                   |
| TB                            | -3.53                  | (-7.05 ; -0.02)        | (-6.7 ; -0.36)        | 0.72                   |
| HepC.treatment_1              | -4.20                  | (-6.51 ; -1.89)        | (-6.56 ; -1.83)       | 0.92                   |
| HepC.treatment_2              | -6.33                  | (-10.31 ; -2.36)       | (-11.28 ; -1.39)      | 0.89                   |
| HepC.treatment_3              |                        |                        |                       | 0.34                   |
| HepB.aware                    |                        |                        |                       | 0.24                   |
| HepB.vaccine                  | 2.07                   | (0 ; 4.14)             | (-0.02 ; 4.16)        | 0.62                   |
| incarceration                 | -1.45                  | (-3.38 ; 0.48)         | (-3.3 ; 0.4)          | 0.50                   |
| med.insurance                 | 1.61                   | (-0.62 ; 3.84)         | (-0.78 ; 4.01)        | 0.49                   |
| med.care.12m                  |                        |                        |                       | 0.50                   |
| detox_1                       | -6.05                  | (-9.01 ; -3.08)        | (-9.17 ; -2.93)       | 0.96                   |
| detox_2                       | -4.28                  | (-7.47 ; -1.1)         | (-7.19 ; -1.38)       | 0.93                   |
| drug.treat.problems_1         | 1.49                   | (-0.4 ; 3.37)          | (-0.44 ; 3.42)        | 0.43                   |
| drug.treat.problems_2         |                        |                        |                       | 0.35                   |
| med.care.problems             | -4.34                  | (-8.11 ; -0.58)        | (-8.02 ; -0.67)       | 0.79                   |
| police.confiscate.syr         |                        |                        |                       | 0.22                   |
| IDU.disclosure.close          |                        |                        |                       | 0.23                   |
| IDU.disclosure.doctor         |                        |                        |                       | 0.20                   |
| IDU.stigma.internal           | -4.17                  | (-6.19 ; -2.15)        | (-6.24 ; -2.1)        | 0.98                   |
| IDU.stigma.conscious          | 1.54                   | (-0.35 ; 3.43)         | (-0.46 ; 3.55)        | 0.53                   |
| <b>Adjusted R<sup>2</sup></b> |                        | <b>0.38</b>            |                       |                        |

**Table S3.5. Forward selection regression using BIC**

| Variables                     | Forward selection, BIC |                        |                       |                        |
|-------------------------------|------------------------|------------------------|-----------------------|------------------------|
|                               | Beta                   | 95% CI<br>(asymptotic) | 95% CI<br>(bootstrap) | Inclusion<br>frequency |
| (Intercept)                   | 82.52                  | (79.65 ; 85.39)        | (79.82 ; 85.22)       | 1.00                   |
| sex                           |                        |                        |                       | 0.20                   |
| age.d                         | -4.37                  | (-6.11 ; -2.63)        | (-6.11 ; -2.64)       | 0.99                   |
| education                     |                        |                        |                       | 0.36                   |
| income.source                 |                        |                        |                       | 0.02                   |
| income.level                  | -4.62                  | (-6.61 ; -2.63)        | (-6.64 ; -2.6)        | 0.97                   |
| living.sit_1                  |                        |                        |                       | 0.10                   |
| living.sit_2                  |                        |                        |                       | 0.04                   |
| marital                       |                        |                        |                       | 0.01                   |
| CAGE                          |                        |                        |                       | 0.37                   |
| age.drug.use                  | -3.42                  | (-5.33 ; -1.5)         | (-5.3 ; -1.54)        | 0.63                   |
| main.drug_1                   |                        |                        |                       | 0.02                   |
| main.drug_2                   |                        |                        |                       | 0.07                   |
| poly.drug                     |                        |                        |                       | 0.49                   |
| drug.freq.days                |                        |                        |                       | 0.40                   |
| drug.freq.times               |                        |                        |                       | 0.12                   |
| inject.used.recent            | -3.22                  | (-5.19 ; -1.25)        | (-5.33 ; -1.11)       | 0.57                   |
| inject.used.ever              |                        |                        |                       | 0.07                   |
| get.unused.syr                |                        |                        |                       | 0.02                   |
| overdose                      |                        |                        |                       | 0.04                   |
| MHI5                          | -3.72                  | (-5.63 ; -1.81)        | (-5.77 ; -1.67)       | 0.66                   |
| sex.active                    |                        |                        |                       | 0.14                   |
| sell.sex.6m                   |                        |                        |                       | 0.01                   |
| pay.sex.6m                    |                        |                        |                       | 0.09                   |
| HIV.HC.partner_1              |                        |                        |                       | 0.05                   |
| HIV.HC.partner_2              |                        |                        |                       | 0.05                   |
| HIV.test                      |                        |                        |                       | 0.21                   |
| HIV.status                    |                        |                        |                       | 0.18                   |
| HIV.care_1                    |                        |                        |                       | 0.03                   |
| HIV.care_2                    | -7.22                  | (-9.32 ; -5.13)        | (-9.51 ; -4.94)       | 1.00                   |
| TB                            |                        |                        |                       | 0.27                   |
| HepC.treatment_1              | -4.49                  | (-6.76 ; -2.21)        | (-6.92 ; -2.06)       | 0.59                   |
| HepC.treatment_2              | -5.68                  | (-9.69 ; -1.66)        | (-10.49 ; -0.86)      | 0.41                   |
| HepC.treatment_3              |                        |                        |                       | 0.05                   |
| HepB.aware                    |                        |                        |                       | 0.12                   |
| HepB.vaccine                  | 3.08                   | (1.07 ; 5.09)          | (1.02 ; 5.14)         | 0.33                   |
| incarceration                 |                        |                        |                       | 0.12                   |
| med.insurance                 |                        |                        |                       | 0.18                   |
| med.care.12m                  |                        |                        |                       | 0.12                   |
| detox_1                       |                        |                        |                       | 0.65                   |
| detox_2                       |                        |                        |                       | 0.48                   |
| drug.treat.problems_1         |                        |                        |                       | 0.09                   |
| drug.treat.problems_2         |                        |                        |                       | 0.19                   |
| med.care.problems             | -5.21                  | (-8.99 ; -1.43)        | (-9.05 ; -1.37)       | 0.45                   |
| police.confiscate.syr         |                        |                        |                       | 0.02                   |
| IDU.disclosure.close          |                        |                        |                       | 0.05                   |
| IDU.disclosure.doctor         |                        |                        |                       | 0.03                   |
| IDU.stigma.internal           | -4.32                  | (-6.24 ; -2.39)        | (-6.33 ; -2.3)        | 0.87                   |
| IDU.stigma.conscious          |                        |                        |                       | 0.09                   |
| <b>Adjusted R<sup>2</sup></b> | <b>0.34</b>            |                        |                       |                        |

**Table S3.6. Forward selection regression using Likelihood Ratio Test (p=0.05)**

| Variables                     | Forward selection, LRT (p=0.05) |                        |                       |                        |
|-------------------------------|---------------------------------|------------------------|-----------------------|------------------------|
|                               | Beta                            | 95% CI<br>(asymptotic) | 95% CI<br>(bootstrap) | Inclusion<br>frequency |
| (Intercept)                   | 77.83                           | (72.7 ; 82.96)         | (72.01 ; 83.65)       | 1.00                   |
| sex                           | -2.39                           | (-4.55 ; -0.24)        | (-4.38 ; -0.4)        | 0.55                   |
| age.d                         | -5.04                           | (-6.82 ; -3.26)        | (-6.76 ; -3.32)       | 1.00                   |
| education                     | 3.56                            | (0.29 ; 6.83)          | (-0.32 ; 7.45)        | 0.52                   |
| income.source                 |                                 |                        |                       | 0.05                   |
| income.level                  | -4.49                           | (-6.45 ; -2.52)        | (-6.48 ; -2.5)        | 0.99                   |
| living.sit_1                  |                                 |                        |                       | 0.30                   |
| living.sit_2                  |                                 |                        |                       | 0.08                   |
| marital                       |                                 |                        |                       | 0.07                   |
| CAGE                          |                                 |                        |                       | 0.46                   |
| age.drug.use                  | -3.18                           | (-5.11 ; -1.24)        | (-5.12 ; -1.24)       | 0.85                   |
| main.drug_1                   |                                 |                        |                       | 0.07                   |
| main.drug_2                   |                                 |                        |                       | 0.10                   |
| poly.drug                     | -3.29                           | (-5.88 ; -0.7)         | (-5.82 ; -0.77)       | 0.75                   |
| drug.freq.days                | -1.89                           | (-3.85 ; 0.07)         | (-4.04 ; 0.26)        | 0.47                   |
| drug.freq.times               |                                 |                        |                       | 0.16                   |
| inject.used.recent            | -2.44                           | (-4.46 ; -0.42)        | (-4.72 ; -0.16)       | 0.64                   |
| inject.used.ever              |                                 |                        |                       | 0.12                   |
| get.unused.syr                |                                 |                        |                       | 0.07                   |
| overdose                      |                                 |                        |                       | 0.08                   |
| MHI5                          | -2.81                           | (-4.71 ; -0.9)         | (-4.86 ; -0.76)       | 0.75                   |
| sex.active                    |                                 |                        |                       | 0.29                   |
| sell.sex.6m                   |                                 |                        |                       | 0.10                   |
| pay.sex.6m                    |                                 |                        |                       | 0.24                   |
| HIV.HC.partner_1              |                                 |                        |                       | 0.18                   |
| HIV.HC.partner_2              |                                 |                        |                       | 0.15                   |
| HIV.test                      | 3.76                            | (0.1 ; 7.42)           | (-0.07 ; 7.58)        | 0.46                   |
| HIV.status                    |                                 |                        |                       | 0.36                   |
| HIV.care_1                    |                                 |                        |                       | 0.10                   |
| HIV.care_2                    | -7.20                           | (-9.3 ; -5.1)          | (-9.45 ; -4.95)       | 1.00                   |
| TB                            | -3.83                           | (-7.33 ; -0.32)        | (-6.95 ; -0.71)       | 0.52                   |
| HepC.treatment_1              | -4.10                           | (-6.39 ; -1.8)         | (-6.49 ; -1.7)        | 0.81                   |
| HepC.treatment_2              | -6.40                           | (-10.37 ; -2.43)       | (-11.26 ; -1.54)      | 0.70                   |
| HepC.treatment_3              |                                 |                        |                       | 0.14                   |
| HepB.aware                    |                                 |                        |                       | 0.15                   |
| HepB.vaccine                  | 2.45                            | (0.43 ; 4.46)          | (0.4 ; 4.49)          | 0.48                   |
| incarceration                 |                                 |                        |                       | 0.30                   |
| med.insurance                 |                                 |                        |                       | 0.32                   |
| med.care.12m                  |                                 |                        |                       | 0.29                   |
| detox_1                       | -5.48                           | (-8.35 ; -2.6)         | (-8.49 ; -2.47)       | 0.87                   |
| detox_2                       | -4.04                           | (-7.2 ; -0.88)         | (-6.94 ; -1.14)       | 0.76                   |
| drug.treat.problems_1         |                                 |                        |                       | 0.24                   |
| drug.treat.problems_2         |                                 |                        |                       | 0.27                   |
| med.care.problems             | -5.21                           | (-8.94 ; -1.48)        | (-8.99 ; -1.44)       | 0.64                   |
| police.confiscate.syr         |                                 |                        |                       | 0.07                   |
| IDU.disclosure.close          |                                 |                        |                       | 0.11                   |
| IDU.disclosure.doctor         |                                 |                        |                       | 0.08                   |
| IDU.stigma.internal           | -3.44                           | (-5.41 ; -1.47)        | (-5.45 ; -1.44)       | 0.94                   |
| IDU.stigma.conscious          |                                 |                        |                       | 0.28                   |
| <b>Adjusted R<sup>2</sup></b> |                                 |                        | <b>0.37</b>           |                        |
