# Supplementary material for: Comparison of subset selection methods in linear regression in the context of health-related quality of life and substance abuse in Russia
Source: BMC Med Res Methodol. 2015 Aug 30;15:71. doi: 10.1186/s12874-015-0066-2 (PMC4553217; doi:10.1186/s12874-015-0066-2)
Supplement: Additional file 5: — Correlation matrix. Matrix of all pairwise correlation coefficients of independent variables considered in subset selection. (PDF 64 kb) [file 12874_2015_66_MOESM5_ESM.pdf]

Additional file 5: Correlation matrix

| Variables          | sex  | age_d | education | income.source | income.level | living.sit_1 | living.sit_2 | marital | CAGE  | age.drug.use | main.drug_1 | main.drug_2 | poly.drug | drug.freq.days | drug.freq.times | inject.used.recent | inject.used.ever | get.unused.syr | overdose | MHI5  | sex.active | sell.sex.6m | pay.sex.6m | HIV.HC.partner_1 | HIV.HC.partner_2 | HIV.test | HIV.status | HIV.care_1 | HIV.care_2 | TB    | HepC.treatment_1 | HepC.treatment_2 | HepC.treatment_3 | HepB.aware | HepB.vaccine | incarceration | med.insurance | med.care.12m | detox_1 | detox_2 | drug.treat.problems_1 | drug.treat.problems_2 | med.care.problems | police.confiscate.syr | IDU.disclosure.close | IDU.disclosure.doctor | IDU.stigma.internal | IDU.stigma.conscious |
|--------------------|------|-------|-----------|---------------|--------------|--------------|--------------|---------|-------|--------------|-------------|-------------|-----------|----------------|-----------------|--------------------|------------------|----------------|----------|-------|------------|-------------|------------|------------------|------------------|----------|------------|------------|------------|-------|------------------|------------------|------------------|------------|--------------|---------------|---------------|--------------|---------|---------|-----------------------|-----------------------|-------------------|-----------------------|----------------------|-----------------------|---------------------|----------------------|
| sex                | 1.00 | -0.25 | 0.05      | 0.12          | -0.01        | 0.00         | -0.06        | 0.06    | -0.10 | -0.11        | 0.04        | -0.08       | 0.00      | -0.05          | -0.04           | -0.15              | -0.15            | 0.11           | -0.18    | -0.01 | 0.05       | 0.43        | -0.12      | 0.02             | -0.06            | 0.03     | -0.05      | 0.03       | -0.06      | -0.07 | -0.07            | -0.01            | -0.05            | -0.18      | 0.09         | -0.14         | -0.01         | -0.09        | -0.10   | 0.02    | -0.13                 | 0.01                  | -0.02             | -0.15                 | -0.01                | -0.03                 | 0.02                | 0.01                 |
| age_d              |      | 1.00  | 0.02      | -0.10         | -0.03        | 0.06         | -0.01        | 0.10    | 0.09  | -0.02        | 0.05        | 0.01        | -0.13     | -0.01          | -0.03           | 0.05               | 0.07             | -0.11          | 0.14     | 0.01  | -0.09      | -0.09       | -0.04      | 0.07             | -0.04            | 0.02     | 0.08       | 0.00       | 0.07       | 0.04  | 0.06             | 0.01             | 0.00             | 0.14       | -0.04        | 0.13          | 0.06          | 0.04         | 0.09    | -0.05   | 0.14                  | -0.11                 | 0.01              | 0.14                  | 0.01                 | 0.08                  | -0.01               | -0.10                |
| education          |      |       | 1.00      | -0.08         | -0.08        | -0.04        | -0.19        | 0.13    | -0.09 | -0.13        | 0.03        | -0.03       | -0.11     | -0.04          | -0.13           | -0.04              | -0.02            | -0.03          | -0.01    | -0.09 | 0.02       | 0.02        | 0.00       | 0.05             | -0.05            | 0.04     | -0.05      | 0.01       | -0.08      | -0.04 | -0.05            | 0.05             | 0.05             | -0.08      | 0.13         | -0.13         | 0.02          | 0.02         | 0.05    | -0.03   | 0.08                  | -0.05                 | 0.03              | 0.12                  | -0.06                | 0.17                  | -0.01               | -0.03                |
| income.source      |      |       |           | 1.00          | 0.08         | 0.01         | 0.00         | -0.12   | 0.04  | 0.12         | -0.04       | 0.07        | 0.09      | 0.22           | 0.21            | 0.10               | 0.12             | 0.08           | 0.09     | 0.19  | 0.01       | 0.32        | 0.02       | -0.02            | 0.12             | 0.07     | 0.10       | 0.04       | 0.10       | 0.04  | 0.11             | 0.03             | -0.06            | 0.03       | 0.06         | 0.09          | -0.17         | -0.02        | -0.15   | 0.06    | -0.04                 | 0.12                  | -0.01             | -0.04                 | -0.01                | -0.12                 | -0.07               | 0.15                 |
| income.level       |      |       |           |               | 1.00         | -0.11        | 0.07         | -0.08   | 0.20  | 0.11         | -0.14       | 0.18        | 0.02      | 0.15           | 0.13            | 0.23               | 0.15             | -0.09          | 0.11     | 0.15  | -0.10      | 0.05        | -0.11      | 0.09             | 0.08             | -0.05    | 0.14       | 0.00       | 0.16       | 0.04  | 0.10             | -0.04            | -0.03            | 0.17       | -0.21        | 0.03          | 0.01          | -0.01        | 0.05    | -0.02   | 0.06                  | 0.07                  | 0.04              | 0.08                  | 0.02                 | -0.16                 | 0.12                | 0.02                 |
| living.sit_1       |      |       |           |               |              | 1.00         | -0.24        | 0.31    | 0.10  | 0.09         | -0.10       | 0.12        | 0.14      | 0.12           | 0.21            | 0.14               | 0.06             | -0.09          | 0.09     | 0.21  | 0.17       | 0.00        | -0.07      | 0.13             | -0.17            | 0.10     | 0.02       | -0.09      | 0.15       | -0.02 | 0.10             | -0.05            | -0.07            | 0.15       | -0.10        | -0.04         | 0.07          | -0.06        | 0.17    | 0.03    | -0.02                 | 0.08                  | -0.05             | 0.10                  | 0.30                 | -0.08                 | 0.23                | -0.01                |
| living.sit_2       |      |       |           |               |              |              | 1.00         | -0.11   | 0.07  | -0.01        | 0.00        | 0.01        | -0.03     | -0.07          | -0.04           | 0.01               | -0.01            | 0.01           | -0.06    | -0.01 | -0.11      | -0.02       | 0.00       | -0.06            | 0.06             | -0.13    | -0.03      | -0.02      | 0.00       | 0.04  | -0.02            | 0.01             | -0.04            | -0.06      | 0.12         | -0.19         | 0.09          | -0.02        | -0.03   | -0.13   | 0.02                  | 0.02                  | -0.06             | 0.01                  | 0.05                 | -0.05                 | 0.01                |                      |
| marital            |      |       |           |               |              |              |              | 1.00    | -0.03 | -0.05        | -0.02       | 0.04        | -0.05     | -0.05          | -0.08           | 0.00               | -0.02            | -0.07          | 0.05     | -0.03 | 0.28       | -0.08       | -0.16      | 0.41             | -0.56            | 0.04     | -0.04      | -0.05      | 0.02       | 0.00  | -0.04            | -0.06            | -0.01            | 0.01       | 0.03         | -0.07         | 0.09          | 0.05         | 0.17    | -0.01   | 0.01                  | -0.02                 | 0.04              | 0.13                  | 0.04                 | 0.12                  | 0.10                | -0.06                |
| CAGE               |      |       |           |               |              |              |              |         | 1.00  | 0.22         | -0.21       | 0.27        | 0.12      | 0.19           | 0.25            | 0.29               | 0.20             | -0.10          | 0.26     | 0.30  | 0.00       | 0.04        | -0.12      | 0.06             | 0.01             | 0.03     | 0.10       | -0.11      | 0.26       | 0.02  | 0.19             | -0.07            | -0.03            | 0.35       | -0.17        | 0.02          | 0.00          | -0.01        | 0.19    | -0.03   | 0.07                  | 0.13                  | 0.09              | 0.14                  | 0.25                 | -0.11                 | 0.23                | 0.02                 |
| age.drug.use       |      |       |           |               |              |              |              |         |       | 1.00         | -0.17       | 0.23        | 0.07      | 0.28           | 0.26            | 0.18               | 0.20             | -0.11          | 0.10     | 0.24  | 0.06       | 0.09        | 0.02       | 0.06             | 0.02             | 0.03     | 0.03       | -0.08      | 0.13       | 0.03  | 0.12             | -0.06            | 0.03             | 0.23       | 0.07         | 0.00          | -0.06         | -0.04        | 0.02    | -0.01   | 0.03                  | 0.14                  | 0.07              | 0.06                  | -0.04                | 0.00                  | 0.10                |                      |
| main.drug_1        |      |       |           |               |              |              |              |         |       |              | 1.00        | -0.92       | -0.16     | -0.40          | -0.36           | -0.24              | -0.05            | 0.14           | -0.05    | -0.22 | -0.05      | -0.03       | 0.13       | -0.07            | 0.01             | 0.01     | -0.08      | 0.06       | -0.16      | 0.03  | -0.11            | 0.14             | 0.08             | -0.26      | 0.12         | 0.07          | -0.04         | -0.03        | -0.20   | 0.02    | -0.01                 | -0.05                 | 0.02              | -0.20                 | -0.22                | 0.08                  | -0.21               | 0.00                 |
| main.drug_2        |      |       |           |               |              |              |              |         |       |              |             | 1.00        | 0.13      | 0.46           | 0.39            | 0.29               | 0.18             | -0.15          | 0.12     | 0.27  | 0.04       | 0.04        | -0.13      | 0.10             | 0.00             | 0.02     | 0.13       | -0.06      | 0.21       | -0.02 | 0.19             | -0.13            | -0.06            | 0.32       | -0.12        | -0.02         | 0.02          | 0.06         | 0.22    | -0.01   | 0.06                  | -0.06                 | -0.01             | 0.24                  | 0.21                 | -0.07                 | 0.22                | 0.02                 |
| poly.drug          |      |       |           |               |              |              |              |         |       |              |             |             | 1.00      | 0.15           | 0.22            | 0.09               | -0.02            | 0.04           | 0.02     | 0.14  | 0.08       | -0.05       | -0.02      | 0.01             | 0.01             | -0.03    | 0.02       | -0.06      | 0.09       | 0.07  | 0.12             | -0.06            | -0.08            | 0.13       | -0.06        | 0.05          | 0.09          | -0.11        | -0.12   | -0.03   | -0.11                 | 0.15                  | 0.01              | -0.13                 | 0.20                 | -0.29                 | 0.16                | 0.14                 |
| drug.freq.days     |      |       |           |               |              |              |              |         |       |              |             |             |           | 1.00           | 0.59            | 0.34               | 0.26             | -0.04          | 0.19     | 0.30  | 0.04       | 0.14        | -0.01      | 0.11             | 0.08             | 0.01     | 0.20       | 0.03       | 0.22       | 0.09  | 0.23             | -0.03            | -0.01            | 0.23       | 0.00         | 0.03          | -0.07         | 0.02         | 0.07    | 0.00    | 0.02                  | 0.16                  | 0.07              | 0.19                  | 0.13                 | -0.10                 | 0.09                | 0.21                 |
| drug.freq.times    |      |       |           |               |              |              |              |         |       |              |             |             |           |                | 1.00            | 0.28               | 0.19             | -0.08          | 0.18     | 0.32  | 0.03       | 0.10        | -0.07      | 0.05             | 0.10             | 0.03     | 0.15       | -0.02      | 0.22       | 0.06  | 0.18             | -0.02            | -0.05            | 0.24       | -0.01        | 0.02          | 0.18          | 0.09         | 0.12    | 0.19    | -0.21                 | 0.10                  | 0.12              |                       |                      |                       |                     |                      |
| inject.used.recent |      |       |           |               |              |              |              |         |       |              |             |             |           |                |                 | 1.00               | 0.37             | -0.19          | 0.26     | 0.25  | 0.03       | 0.02        | -0.04      | 0.14             | 0.07             | 0.06     | 0.31       | -0.02      | 0.34       | 0.05  | 0.24             | -0.03            | -0.06            | 0.32       | -0.15        | -0.07         | 0.01          | 0.10         | 0.24    | -0.02   | 0.10                  | 0.13                  | 0.09              | 0.27                  | 0.23                 | 0.00                  | 0.20                | 0.08                 |
| inject.used.ever   |      |       |           |               |              |              |              |         |       |              |             |             |           |                |                 |                    | 1.00             | -0.08          | 0.27     | 0.19  | -0.03      | 0.03        | 0.05       | 0.10             | 0.08             | 0.07     | 0.26       | 0.12       | 0.16       | 0.05  | 0.20             | 0.01             | 0.02             | 0.22       | -0.11        | 0.04          | -0.04         | 0.06         | 0.08    | 0.02    | 0.09                  | 0.07                  | 0.03              | 0.15                  | 0.02                 | -0.01                 | 0.08                | 0.11                 |
| get.unused.syr     |      |       |           |               |              |              |              |         |       |              |             |             |           |                |                 |                    |                  | 1.00           | -0.12    | -0.09 | -0.03      | 0.02        | 0.07       | -0.07            | 0.01             | 0.02     | -0.10      | 0.10       | -0.13      | 0.00  | -0.08            | 0.06             | 0.06             | 0.18       | 0.13         | 0.10          | -0.07         | -0.07        | -0.30   | -0.09   | 0.09                  | 0.06                  | -0.29             | -0.18                 | -0.13                | -0.18                 | 0.11                |                      |
| overdose           |      |       |           |               |              |              |              |         |       |              |             |             |           |                |                 |                    |                  |                | 1.00     | 0.14  | -0.03      | -0.05       | -0.07      | 0.13             | -0.05            | 0.08     | 0.15       | 0.00       | 0.16       | 0.08  | 0.21             | -0.02            | -0.07            | 0.33       | -0.20        | 0.02          | 0.07          | 0.08         | 0.21    | 0.04    | 0.17                  | 0.06                  | 0.00              | 0.19                  | 0.12                 | -0.05                 | 0.12                | -0.01                |
| MHI5               |      |       |           |               |              |              |              |         |       |              |             |             |           |                |                 |                    |                  |                |          | 1.00  | 0.04       | 0.13        | -0.11      | 0.09             | 0.07             | 0.04     | 0.16       | -0.05      | 0.22       | 0.06  | 0.16             | -0.03            | -0.08            | 0.21       | 0.01         | -0.03         | -0.05         | -0.05        | 0.10    | 0.02    | 0.00                  | 0.20                  | 0.05              | 0.13                  | 0.24                 | -0.10                 | 0.25                | 0.18                 |
| sex.active         |      |       |           |               |              |              |              |         |       |              |             |             |           |                |                 |                    |                  |                |          |       | 1.00       | 0.15        | 0.16       | 0.33             | -0.51            | 0.04     | -0.03      | -0.01      | 0.02       | 0.02  | -0.07            | 0.03             | 0.01             | 0.03       | 0.11         | 0.02          | 0.05          | 0.04         | 0.05    | 0.01    | -0.01                 | 0.03                  | 0.04              | 0.08                  | -0.02                | -0.01                 | 0.03                | 0.00                 |
| sell.sex.6m        |      |       |           |               |              |              |              |         |       |              |             |             |           |                |                 |                    |                  |                |          |       |            | 1.00        | -0.04      | -0.05            | 0.10             | 0.01     | 0.01       | 0.04       | 0.00       | -0.07 | 0.01             | 0.01             | 0.00             | -0.06      | 0.18         | -0.11         | -0.20         | 0.09         | -0.02   | 0.01    | -0.08                 | 0.00                  | 0.10              | 0.07                  | 0.01                 | 0.03                  | -0.08               | 0.08                 |
| pay.sex.6m         |      |       |           |               |              |              |              |         |       |              |             |             |           |                |                 |                    |                  |                |          |       |            |             | 1.00       | -0.14            | 0.19             | 0.00     | -0.03      | 0.06       | -0.11      | 0.02  | -0.07            | 0.08             | 0.03             | -0.10      | 0.16         | 0.11          | -0.06         | 0.02         | -0.09   | 0.03    | 0.03                  | -0.08                 | 0.10              | 0.02                  | -0.14                | 0.08                  | -0.19               | 0.05                 |
| HIV.HC.partner_1   |      |       |           |               |              |              |              |         |       |              |             |             |           |                |                 |                    |                  |                |          |       |            |             |            | 1.00             | -0.66            | 0.10     | 0.16       | 0.07       | 0.17       | 0.07  | 0.12             | 0.00             | -0.02            | 0.16       | -0.03        | 0.01          | 0.06          | 0.01         | 0.09    | 0.01    | 0.08                  | 0.07                  | -0.01             | 0.08                  | -0.05                | 0.00                  | 0.14                | 0.04                 |
| HIV.HC.partner_2   |      |       |           |               |              |              |              |         |       |              |             |             |           |                |                 |                    |                  |                |          |       |            |             |            |                  | 1.00             | 0.00     | 0.08       | 0.03       | 0.03       | 0.02  | 0.07             | 0.02             | 0.00             | -0.03      | -0.02        | 0.02          | -0.14         | -0.02        | -0.05   | -0.02   | -0.01                 | 0.03                  | 0.08              | -0.02                 | 0.08                 | -0.03                 | -0.07               | 0.06                 |
| HIV.test           |      |       |           |               |              |              |              |         |       |              |             |             |           |                |                 |                    |                  |                |          |       |            |             |            |                  |                  | 1.00     | 0.15       | 0.11       | 0.18       | 0.07  | 0.15             | 0.05             | 0.02             | 0.14       | 0.10         | 0.10          | -0.01         | -0.08        | 0.03    | 0.04    | 0.16                  | 0.06                  | 0.04              | 0.05                  | 0.00                 | 0.07                  | 0.10                | 0.04                 |
| HIV.status         |      |       |           |               |              |              |              |         |       |              |             |             |           |                |                 |                    |                  |                |          |       |            |             |            |                  |                  |          | 1.00       | 0.38       | 0.61       | 0.14  | 0.14             | 0.01             | 0.02             | 0.20       | -0.15        | 0.12          | -0.06         | 0.02         | 0.03    | 0.01    | 0.07                  | 0.14                  | 0.07              | 0.11                  | 0.03                 | -0.12                 | 0.12                | 0.16                 |
| HIV.care_1         |      |       |           |               |              |              |              |         |       |              |             |             |           |                |                 |                    |                  |                |          |       |            |             |            |                  |                  |          |            | 1.00       | -0.29      | 0.05  | -0.17            | 0.18             | 0.22             | -0.08      | 0.13         | 0.05          | 0.05          | -0.27        | -0.14   | 0.09    | 0.08                  | 0.02                  | 0.13              | -0.05                 | -0.21                | -0.02                 | -0.17               | 0.06                 |
| HIV.care_2         |      |       |           |               |              |              |              |         |       |              |             |             |           |                |                 |                    |                  |                |          |       |            |             |            |                  |                  |          |            |            | 1.00       | 0.13  | 0.28             | -0.09            | -0.14            | 0.31       | -0.23        | 0.12          | -0.08         | 0.13         | 0.14    | -0.05   | 0.02                  | 0.19                  | -0.02             | 0.12                  | 0.24                 | -0.14                 | -0.26               | 0.13                 |
| TB                 |      |       |           |               |              |              |              |         |       |              |             |             |           |                |                 |                    |                  |                |          |       |            |             |            |                  |                  |          |            |            |            | 1.00  | 0.04             | 0.04             | -0.02            | 0.00       | -0.01        | 0.13          | -0.05         | 0.00         | -0.07   | 0.01    | -0.06                 | 0.11                  | 0.10              | 0.03                  | -0.01                | -0.05                 | 0.04                | 0.14                 |
| HepC.treatment_1   |      |       |           |               |              |              |              |         |       |              |             |             |           |                |                 |                    |                  |                |          |       |            |             |            |                  |                  |          |            |            |            |       | 1.00             | -0.42            | -0.39            | 0.32       | -0.14        | 0.05          | 0.03          | 0.05         | 0.13    | 0.07    | 0.15                  | 0.08                  | -0.04             | 0.09                  | 0.15                 | -0.11                 | 0.16                | 0.07                 |
| HepC.treatment_2   |      |       |           |               |              |              |              |         |       |              |             |             |           |                |                 |                    |                  |                |          |       |            |             |            |                  |                  |          |            |            |            |       |                  | 1.00             | -0.06            | -0.07      | 0.12         | 0.03          | -0.10         | -0.04        | -0.10   | -0.02   | -0.01                 | 0.04                  | 0.09              | -0.03                 | -0.16                | 0.02                  | -0.07               | 0.07                 |
| HepC.treatment_3   |      |       |           |               |              |              |              |         |       |              |             |             |           |                |                 |                    |                  |                |          |       |            |             |            |                  |                  |          |            |            |            |       |                  |                  | 1.00             | -0.10      | 0.14         | -0.01         | 0.02          | -0.09        | -0.09   |         |                       |                       |                   |                       |                      |                       |                     |                      |
