# Supplementary material for: Comparison of subset selection methods in linear regression in the context of health-related quality of life and substance abuse in Russia
Source: Springer Nature journal article supplement (doi:10.1186/s12874-015-0066-2), 2015-08-29

## Additional file 4: Distribution of the dependent variable

Dependent Variable: EuroQoL 5D visual analogue scale measure of health-related quality of life

Mean = 63.97                      Range = (5 – 100)  
Median = 65.00                  Standard deviation = 15.34

**Figure S4.1. Histogram of the dependent variable**

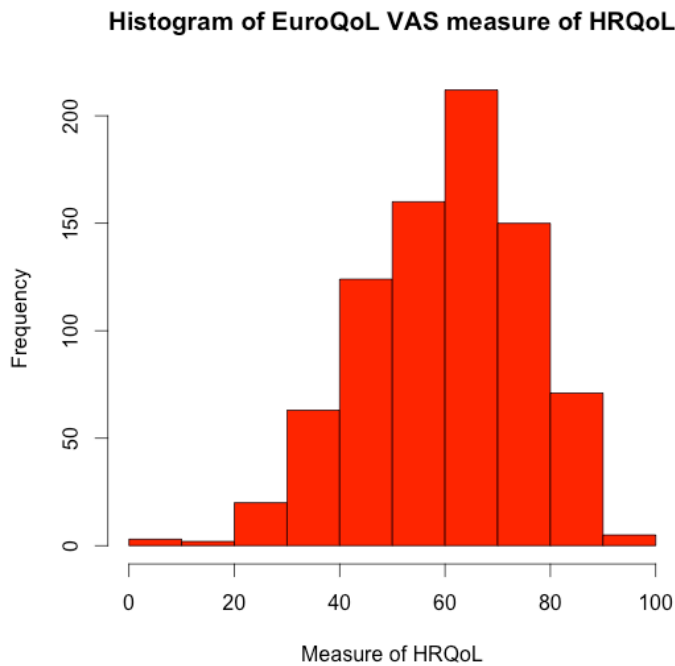

**Figure S4.2. Q-Q plot of the transformed (standardized) dependent variable**

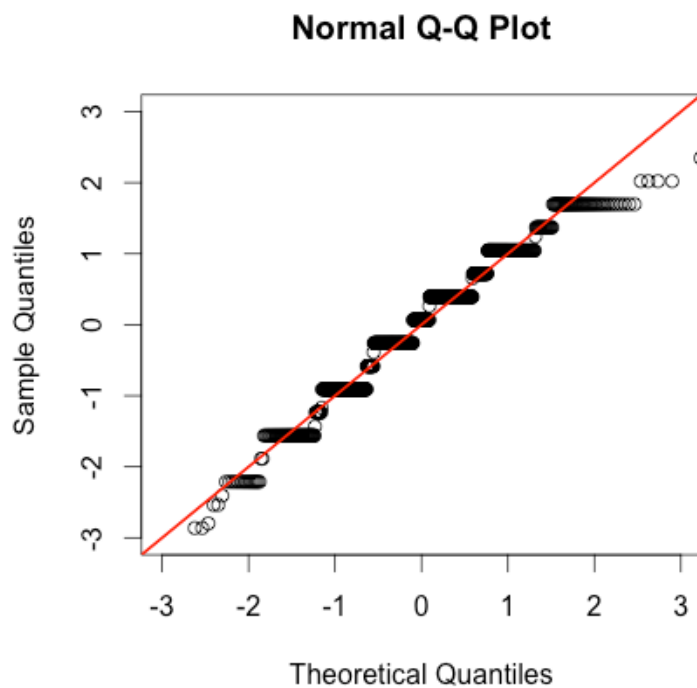

Supplement: MOESM4 [file 9737326]
