# Supplementary material for: Comparison of subset selection methods in linear regression in the context of health-related quality of life and substance abuse in Russia
Source: Springer Nature journal article supplement (doi:10.1186/s12874-015-0066-2), 2015-08-29
Supplement: MOESM6 [file 9737326]

## Additional file 6: Penalized regression methods

Note: in the figures two vertical lines represent the following values of  $\lambda$ : a) the value that minimizes the cross-validation MSE ( $\lambda_{min}$ ); b) the maximum value within one standard error of the  $\lambda_{min}$  ( $\lambda_{1SE}$ ). The numbers at the top axis show the number of non-zero regression coefficients for every value of  $\lambda$ ; which corresponds to the number of variables retained in the model.

Figure S6.1: Lasso coefficients path and results of cross-validation

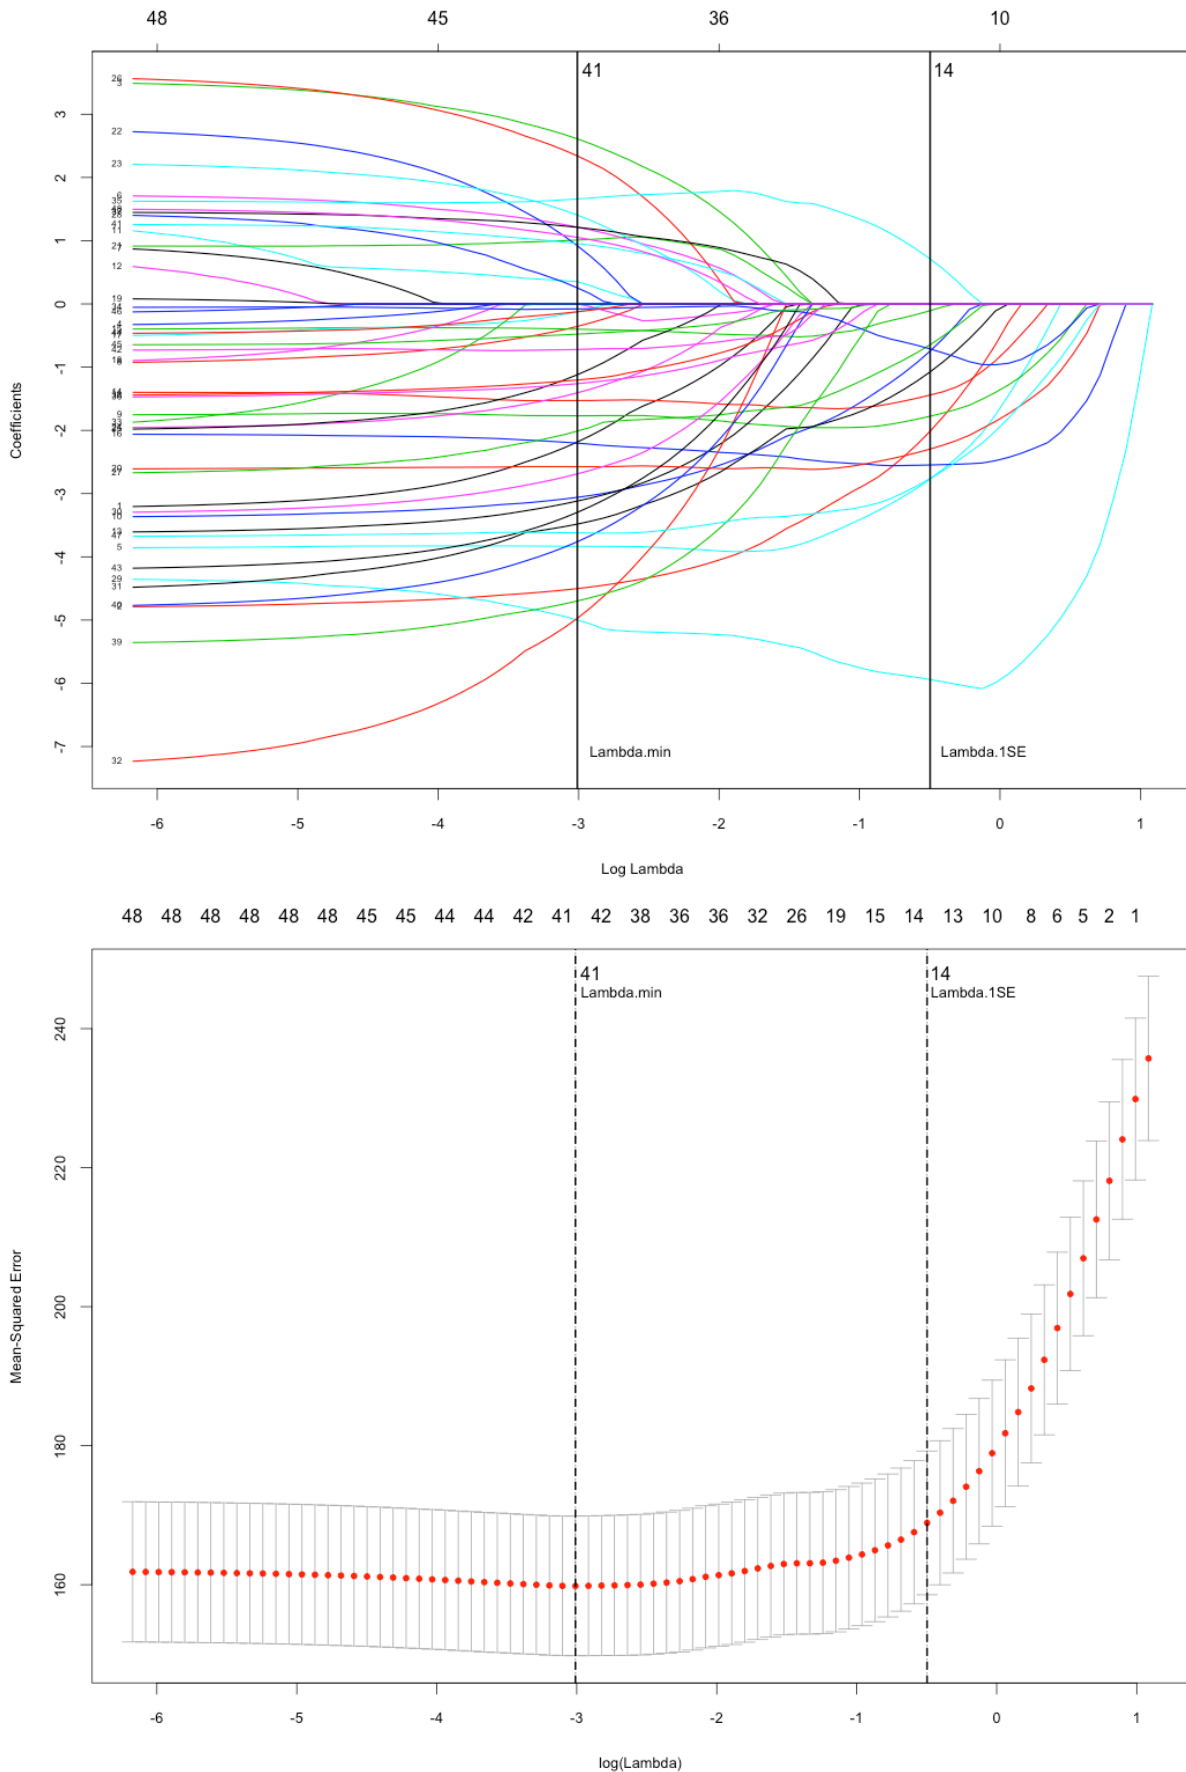

**Table S6.1: Lasso coefficients, 95% confidence intervals and inclusion probabilities***Note: Inclusion frequency is estimated using bootstrap.*

| Variables             | Lasso: $\lambda_{min}$ |                 |                     | Lasso: $\lambda_{1SE}$ |                 |                     |
|-----------------------|------------------------|-----------------|---------------------|------------------------|-----------------|---------------------|
|                       | Beta                   | 95% CI          | Inclusion frequency | Beta                   | 95% CI          | Inclusion frequency |
| (Intercept)           | 78.40                  | (70.76 ; 86.04) | 1.00                | 76.53                  | (73.89 ; 79.18) | 1.00                |
| sex                   | -2.18                  | (-4.34 ; -0.03) | 0.96                |                        |                 | 0.20                |
| age.d                 | -4.50                  | (-6.29 ; -2.72) | 1.00                | -2.01                  | (-3.76 ; -0.26) | 1.00                |
| education             | 2.61                   | (-1.06 ; 6.28)  | 0.89                |                        |                 | 0.30                |
| income.source         |                        |                 | 0.64                |                        |                 | 0.05                |
| income.level          | -3.83                  | (-5.93 ; -1.74) | 1.00                | -2.77                  | (-4.81 ; -0.73) | 1.00                |
| living.sit_1          | 1.21                   | (-0.59 ; 3.01)  | 0.90                |                        |                 | 0.18                |
| living.sit_2          |                        |                 | 0.39                |                        |                 | 0.00                |
| marital               | -0.36                  | (-2.19 ; 1.48)  | 0.71                |                        |                 | 0.06                |
| CAGE                  | -1.77                  | (-3.85 ; 0.31)  | 0.95                | -1.78                  | (-3.82 ; 0.27)  | 0.94                |
| age.drug.use          | -3.06                  | (-5.02 ; -1.09) | 1.00                | -0.75                  | (-2.32 ; 0.83)  | 0.93                |
| main.drug_1           | 0.35                   | (-1.26 ; 1.96)  | 0.53                |                        |                 | 0.09                |
| main.drug_2           |                        |                 | 0.51                |                        |                 | 0.39                |
| poly.drug             | -3.12                  | (-5.84 ; -0.39) | 0.99                |                        |                 | 0.50                |
| drug.freq.days        | -1.53                  | (-3.6 ; 0.54)   | 0.89                | -1.44                  | (-3.28 ; 0.4)   | 0.86                |
| drug.freq.times       | -0.40                  | (-2.1 ; 1.3)    | 0.73                | -0.11                  | (-1.33 ; 1.11)  | 0.55                |
| inject.used.recent    | -2.20                  | (-4.43 ; 0.03)  | 0.97                | -2.55                  | (-4.8 ; -0.3)   | 0.98                |
| inject.used.ever      | -0.13                  | (-2.48 ; 2.23)  | 0.61                |                        |                 | 0.07                |
| get.unused.syr        |                        |                 | 0.52                |                        |                 | 0.01                |
| overdose              |                        |                 | 0.74                |                        |                 | 0.32                |
| MHI5                  | -2.57                  | (-4.72 ; -0.42) | 0.99                | -2.30                  | (-4.43 ; -0.16) | 0.98                |
| sex.active            | 1.01                   | (-1.19 ; 3.21)  | 0.81                |                        |                 | 0.29                |
| sell.sex.6m           | 0.92                   | (-1.73 ; 3.57)  | 0.58                |                        |                 | 0.00                |
| pay.sex.6m            | 1.41                   | (-1.25 ; 4.06)  | 0.79                |                        |                 | 0.10                |
| HIV.HC.partner_1      | -1.41                  | (-3.98 ; 1.17)  | 0.85                |                        |                 | 0.29                |
| HIV.HC.partner_2      | -1.12                  | (-3.47 ; 1.23)  | 0.82                |                        |                 | 0.26                |
| HIV.test              | 2.34                   | (-1.21 ; 5.9)   | 0.82                |                        |                 | 0.07                |
| HIV.status            | -2.01                  | (-5.06 ; 1.04)  | 0.94                | -0.65                  | (-2.45 ; 1.16)  | 0.85                |
| HIV.care_1            | 0.25                   | (-2.74 ; 3.25)  | 0.60                |                        |                 | 0.03                |
| HIV.care_2            | -5.00                  | (-8.36 ; -1.64) | 0.99                | -5.94                  | (-8.47 ; -3.41) | 1.00                |
| TB                    | -2.69                  | (-5.57 ; 0.2)   | 0.94                |                        |                 | 0.23                |
| HepC.treatment_1      | -3.48                  | (-6.12 ; -0.85) | 0.99                | -1.07                  | (-2.99 ; 0.84)  | 0.90                |
| HepC.treatment_2      | -4.97                  | (-9.98 ; 0.03)  | 0.95                |                        |                 | 0.16                |
| HepC.treatment_3      |                        |                 | 0.44                |                        |                 | 0.01                |
| HepB.aware            | -0.08                  | (-1.81 ; 1.65)  | 0.72                | -0.71                  | (-2.36 ; 0.94)  | 0.58                |
| HepB.vaccine          | 1.66                   | (-0.46 ; 3.78)  | 0.93                | 0.71                   | (-0.84 ; 2.27)  | 0.84                |
| incarceration         | -1.26                  | (-3 ; 0.48)     | 0.92                |                        |                 | 0.53                |
| med.insurance         | 1.21                   | (-1.07 ; 3.49)  | 0.85                |                        |                 | 0.38                |
| med.care.12m          | -1.20                  | (-3 ; 0.59)     | 0.89                |                        |                 | 0.40                |
| detox_1               | -4.70                  | (-8.16 ; -1.24) | 0.99                |                        |                 | 0.60                |
| detox_2               | -3.76                  | (-6.85 ; -0.67) | 0.98                |                        |                 | 0.29                |
| drug.treat.problems_1 | 0.95                   | (-0.87 ; 2.78)  | 0.84                |                        |                 | 0.20                |
| drug.treat.problems_2 | -0.72                  | (-3.39 ; 1.94)  | 0.71                |                        |                 | 0.30                |
| med.care.problems     | -3.30                  | (-6.94 ; 0.35)  | 0.93                |                        |                 | 0.22                |
| police.confiscate.syr | -0.12                  | (-2.06 ; 1.81)  | 0.72                |                        |                 | 0.19                |
| IDU.disclosure.close  | -0.48                  | (-2.23 ; 1.28)  | 0.79                |                        |                 | 0.46                |
| IDU.disclosure.doctor |                        |                 | 0.72                |                        |                 | 0.19                |
| IDU.stigma.internal   | -3.62                  | (-5.78 ; -1.46) | 1.00                | -2.76                  | (-4.8 ; -0.72)  | 1.00                |
| IDU.stigma.conscious  | 1.05                   | (-0.79 ; 2.89)  | 0.87                |                        |                 | 0.18                |

**Figure S6.2: Adaptive lasso coefficients path and results of cross-validation**

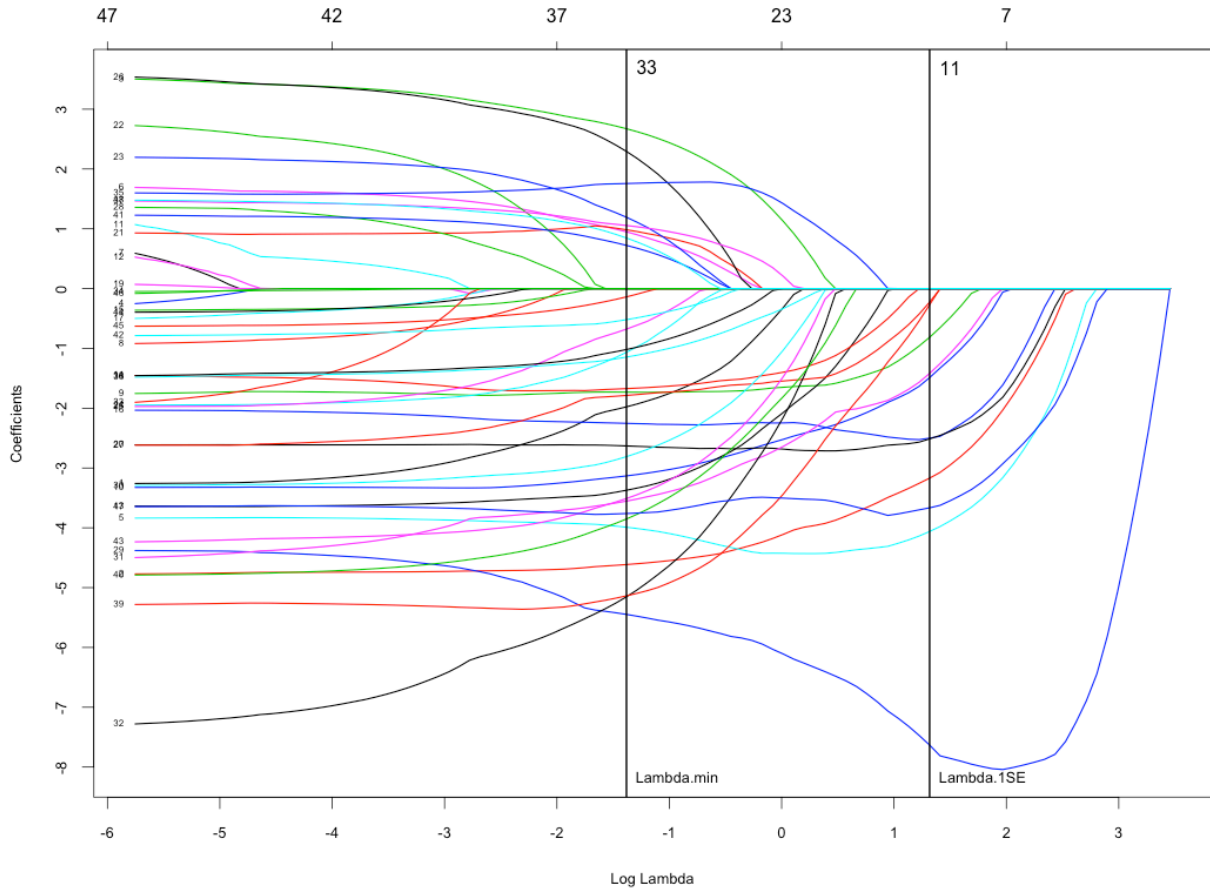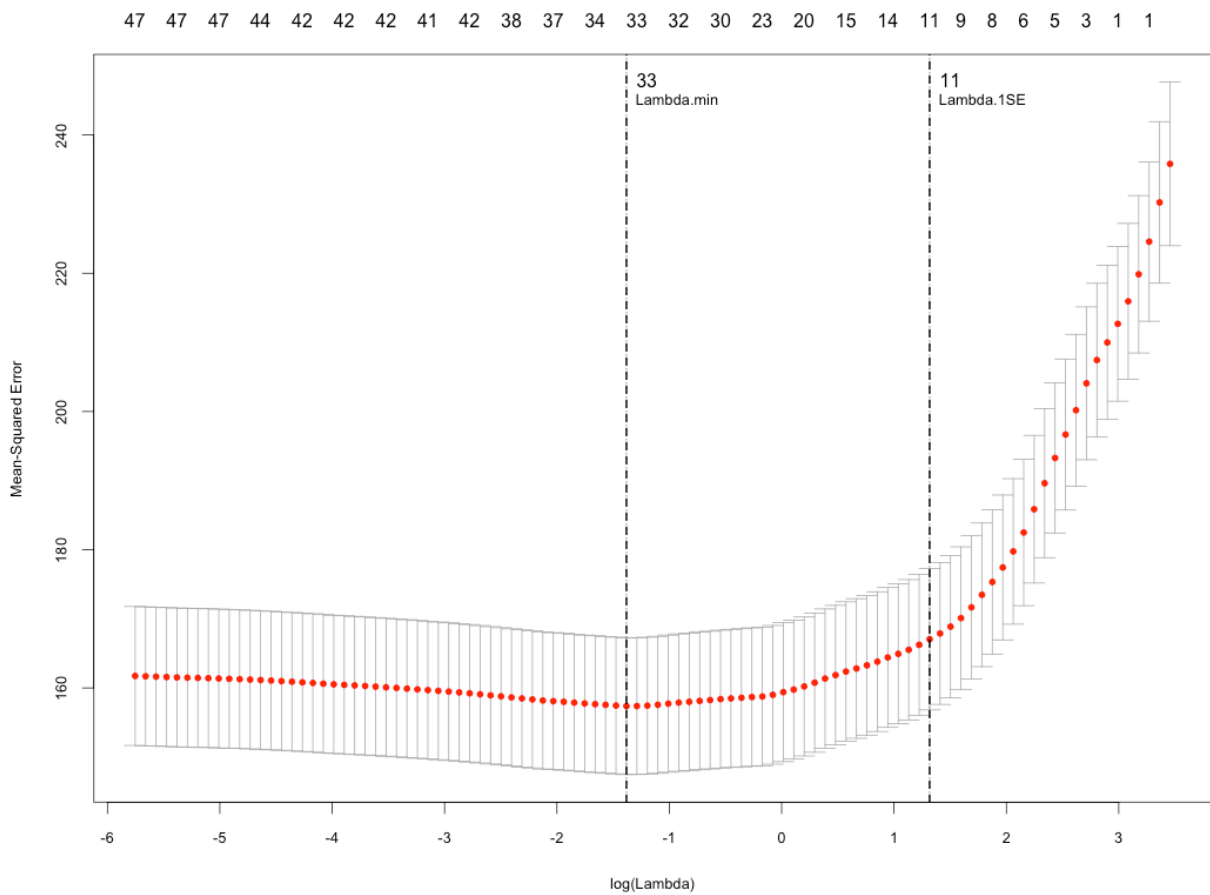

**Table S6.2: Adaptive lasso coefficients, 95% confidence intervals and inclusion probabilities***Note: Inclusion frequency is estimated using bootstrap*

| Variables             | Adaptive Lasso: $\lambda_{min}$ |                 |                     | Adaptive Lasso: $\lambda_{1SE}$ |                  |                     |
|-----------------------|---------------------------------|-----------------|---------------------|---------------------------------|------------------|---------------------|
|                       | Beta                            | 95% CI          | Inclusion frequency | Beta                            | 95% CI           | Inclusion frequency |
| (Intercept)           | 78.58                           | (71.93 ; 85.23) | 1.00                | 77.98                           | (75.61 ; 80.35)  | 1.00                |
| sex                   | -1.98                           | (-3.96 ; 0.01)  | 0.89                |                                 |                  | 0.20                |
| age.d                 | -4.61                           | (-6.36 ; -2.86) | 1.00                | -3.17                           | (-4.93 ; -1.4)   | 1.00                |
| education             | 2.67                            | (-0.92 ; 6.27)  | 0.80                |                                 |                  | 0.38                |
| income.source         |                                 |                 | 0.32                |                                 |                  | 0.02                |
| income.level          | -3.99                           | (-6.05 ; -1.93) | 1.00                | -4.06                           | (-6.07 ; -2.05)  | 0.99                |
| living.sit_1          | 0.95                            | (-0.71 ; 2.61)  | 0.73                |                                 |                  | 0.12                |
| living.sit_2          |                                 |                 | 0.24                |                                 |                  | 0.01                |
| marital               |                                 |                 | 0.45                |                                 |                  | 0.04                |
| CAGE                  | -1.73                           | (-3.77 ; 0.31)  | 0.87                | -0.81                           | (-2.54 ; 0.91)   | 0.63                |
| age.drug.use          | -3.13                           | (-5.06 ; -1.2)  | 0.99                | -1.49                           | (-3.28 ; 0.3)    | 0.84                |
| main.drug_1           |                                 |                 | 0.32                |                                 |                  | 0.06                |
| main.drug_2           |                                 |                 | 0.29                |                                 |                  | 0.06                |
| poly.drug             | -3.37                           | (-6.02 ; -0.72) | 0.95                |                                 |                  | 0.55                |
| drug.freq.days        | -1.67                           | (-3.66 ; 0.32)  | 0.77                |                                 |                  | 0.51                |
| drug.freq.times       |                                 |                 | 0.45                |                                 |                  | 0.17                |
| inject.used.recent    | -2.25                           | (-4.48 ; -0.03) | 0.91                | -2.50                           | (-4.68 ; -0.32)  | 0.75                |
| inject.used.ever      |                                 |                 | 0.37                |                                 |                  | 0.06                |
| get.unused.syr        |                                 |                 | 0.31                |                                 |                  | 0.01                |
| overdose              |                                 |                 | 0.39                |                                 |                  | 0.06                |
| MHI5                  | -2.63                           | (-4.75 ; -0.52) | 0.96                | -2.51                           | (-4.59 ; -0.44)  | 0.84                |
| sex.active            | 0.98                            | (-1.04 ; 3)     | 0.60                |                                 |                  | 0.15                |
| sell.sex.6m           |                                 |                 | 0.41                |                                 |                  | 0.01                |
| pay.sex.6m            | 1.19                            | (-1.26 ; 3.64)  | 0.64                |                                 |                  | 0.10                |
| HIV.HC.partner_1      | -1.07                           | (-3.45 ; 1.32)  | 0.70                |                                 |                  | 0.24                |
| HIV.HC.partner_2      | -0.68                           | (-2.73 ; 1.37)  | 0.66                |                                 |                  | 0.21                |
| HIV.test              | 2.29                            | (-1.13 ; 5.72)  | 0.71                |                                 |                  | 0.14                |
| HIV.status            | -1.79                           | (-4.53 ; 0.96)  | 0.87                | -0.23                           | (-1.74 ; 1.29)   | 0.61                |
| HIV.care_1            |                                 |                 | 0.40                |                                 |                  | 0.05                |
| HIV.care_2            | -5.45                           | (-8.52 ; -2.37) | 0.98                | -7.63                           | (-10.08 ; -5.19) | 0.98                |
| TB                    | -2.81                           | (-5.7 ; 0.08)   | 0.86                |                                 |                  | 0.28                |
| HepC.treatment_1      | -3.55                           | (-5.92 ; -1.19) | 0.97                | -1.42                           | (-3.42 ; 0.59)   | 0.81                |
| HepC.treatment_2      | -5.15                           | (-9.93 ; -0.38) | 0.92                |                                 |                  | 0.39                |
| HepC.treatment_3      |                                 |                 | 0.27                |                                 |                  | 0.01                |
| HepB.aware            |                                 |                 | 0.43                |                                 |                  | 0.14                |
| HepB.vaccine          | 1.76                            | (-0.26 ; 3.77)  | 0.79                |                                 |                  | 0.47                |
| incarceration         | -1.15                           | (-2.83 ; 0.54)  | 0.76                |                                 |                  | 0.27                |
| med.insurance         | 1.05                            | (-1.05 ; 3.16)  | 0.67                |                                 |                  | 0.22                |
| med.care.12m          | -1.02                           | (-2.72 ; 0.68)  | 0.69                |                                 |                  | 0.17                |
| detox_1               | -5.14                           | (-8.43 ; -1.85) | 0.98                | -0.27                           | (-2.26 ; 1.72)   | 0.72                |
| detox_2               | -3.85                           | (-6.89 ; -0.81) | 0.94                |                                 |                  | 0.44                |
| drug.treat.problems_1 | 0.72                            | (-0.83 ; 2.27)  | 0.59                |                                 |                  | 0.11                |
| drug.treat.problems_2 | -0.52                           | (-2.86 ; 1.82)  | 0.53                |                                 |                  | 0.18                |
| med.care.problems     | -3.51                           | (-7.12 ; 0.1)   | 0.87                |                                 |                  | 0.35                |
| police.confiscate.syr |                                 |                 | 0.44                |                                 |                  | 0.08                |
| IDU.disclosure.close  | -0.14                           | (-1.54 ; 1.26)  | 0.50                |                                 |                  | 0.14                |
| IDU.disclosure.doctor |                                 |                 | 0.39                |                                 |                  | 0.06                |
| IDU.stigma.internal   | -3.76                           | (-5.87 ; -1.65) | 1.00                | -3.67                           | (-5.68 ; -1.65)  | 0.97                |
| IDU.stigma.conscious  | 0.85                            | (-0.84 ; 2.53)  | 0.67                |                                 |                  | 0.12                |

Figure S6.3: Adaptive elastic net coefficients path and results of cross-validation

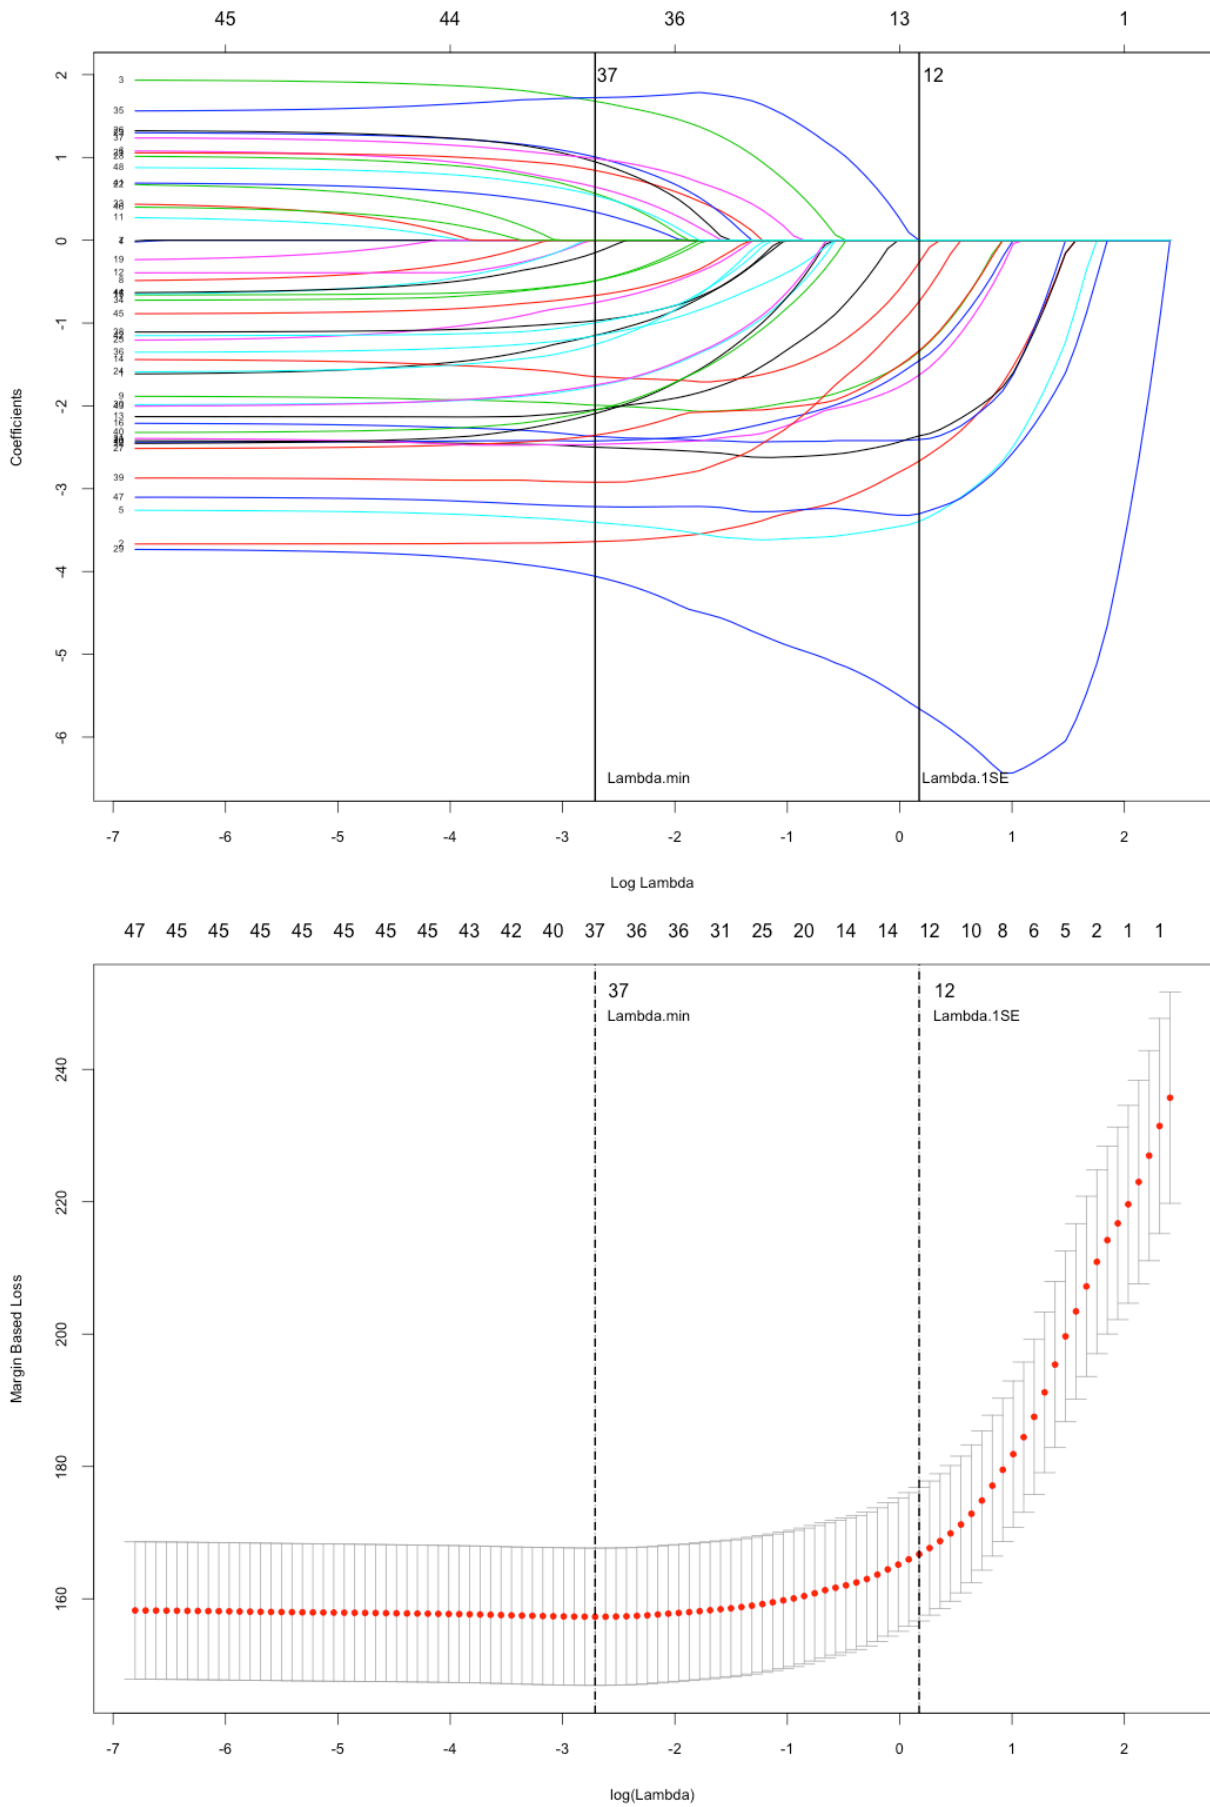

**Table S6.3: Adaptive elastic net coefficients, 95% confidence intervals and inclusion probabilities***Note: Inclusion frequency is estimated using bootstrap*

| Variables             | Adaptive Elastic Net: $\lambda_{min}$ |                 |                     | Adaptive Elastic Net: $\lambda_{1SE}$ |                 |                     |
|-----------------------|---------------------------------------|-----------------|---------------------|---------------------------------------|-----------------|---------------------|
|                       | Beta                                  | 95% CI          | Inclusion frequency | Beta                                  | 95% CI          | Inclusion frequency |
| (Intercept)           | 78.82                                 | (74.27 ; 83.38) | 1.00                | 77.64                                 | (75.51 ; 79.77) | 1.00                |
| sex                   | -1.15                                 | (-2.51 ; 0.21)  | 0.92                |                                       |                 | 0.21                |
| age.d                 | -3.64                                 | (-5 ; -2.28)    | 1.00                | -2.67                                 | (-4.1 ; -1.23)  | 1.00                |
| education             | 1.68                                  | (-0.31 ; 3.67)  | 0.88                |                                       |                 | 0.44                |
| income.source         |                                       |                 | 0.52                |                                       |                 | 0.03                |
| income.level          | -3.41                                 | (-4.93 ; -1.88) | 1.00                | -3.40                                 | (-4.96 ; -1.83) | 0.99                |
| living.sit_1          | 0.64                                  | (-0.59 ; 1.88)  | 0.80                |                                       |                 | 0.14                |
| living.sit_2          |                                       |                 | 0.44                |                                       |                 | 0.01                |
| marital               |                                       |                 | 0.62                |                                       |                 | 0.05                |
| CAGE                  | -1.99                                 | (-3.53 ; -0.46) | 0.96                | -1.35                                 | (-2.88 ; 0.19)  | 0.76                |
| age.drug.use          | -2.42                                 | (-3.86 ; -0.99) | 1.00                | -1.45                                 | (-2.9 ; -0.01)  | 0.89                |
| main.drug_1           |                                       |                 | 0.52                |                                       |                 | 0.09                |
| main.drug_2           |                                       |                 | 0.49                |                                       |                 | 0.10                |
| poly.drug             | -2.05                                 | (-3.73 ; -0.36) | 0.98                |                                       |                 | 0.61                |
| drug.freq.days        | -1.65                                 | (-3.13 ; -0.17) | 0.89                | -0.27                                 | (-1.33 ; 0.79)  | 0.60                |
| drug.freq.times       | -0.49                                 | (-1.63 ; 0.65)  | 0.64                |                                       |                 | 0.23                |
| inject.used.recent    | -2.37                                 | (-4 ; -0.74)    | 0.97                | -2.41                                 | (-4.1 ; -0.71)  | 0.84                |
| inject.used.ever      |                                       |                 | 0.59                |                                       |                 | 0.10                |
| get.unused.syr        |                                       |                 | 0.51                |                                       |                 | 0.02                |
| overdose              |                                       |                 | 0.58                |                                       |                 | 0.09                |
| MHI5                  | -2.50                                 | (-4.11 ; -0.89) | 0.99                | -2.36                                 | (-4 ; -0.73)    | 0.90                |
| sex.active            | 0.84                                  | (-0.6 ; 2.29)   | 0.76                |                                       |                 | 0.19                |
| sell.sex.6m           |                                       |                 | 0.57                |                                       |                 | 0.01                |
| pay.sex.6m            | 1.01                                  | (-0.36 ; 2.37)  | 0.82                |                                       |                 | 0.16                |
| HIV.HC.partner_1      | -1.26                                 | (-2.8 ; 0.28)   | 0.87                |                                       |                 | 0.35                |
| HIV.HC.partner_2      | -0.75                                 | (-2.05 ; 0.54)  | 0.83                |                                       |                 | 0.26                |
| HIV.test              | 0.95                                  | (-0.59 ; 2.48)  | 0.80                |                                       |                 | 0.15                |
| HIV.status            | -2.35                                 | (-3.88 ; -0.83) | 0.98                | -1.33                                 | (-2.84 ; 0.17)  | 0.81                |
| HIV.care_1            | 0.57                                  | (-0.69 ; 1.82)  | 0.69                |                                       |                 | 0.10                |
| HIV.care_2            | -4.06                                 | (-5.66 ; -2.45) | 1.00                | -5.66                                 | (-7.37 ; -3.94) | 0.99                |
| TB                    | -1.76                                 | (-3.22 ; -0.3)  | 0.95                |                                       |                 | 0.38                |
| HepC.treatment_1      | -2.47                                 | (-4.04 ; -0.89) | 0.99                | -1.63                                 | (-3.24 ; -0.01) | 0.88                |
| HepC.treatment_2      | -2.09                                 | (-4.12 ; -0.06) | 0.96                |                                       |                 | 0.39                |
| HepC.treatment_3      |                                       |                 | 0.47                |                                       |                 | 0.02                |
| HepB.aware            | -0.49                                 | (-1.74 ; 0.76)  | 0.64                |                                       |                 | 0.23                |
| HepB.vaccine          | 1.72                                  | (0.22 ; 3.22)   | 0.90                |                                       |                 | 0.57                |
| incarceration         | -1.15                                 | (-2.5 ; 0.19)   | 0.87                |                                       |                 | 0.35                |
| med.insurance         | 0.99                                  | (-0.62 ; 2.6)   | 0.80                |                                       |                 | 0.28                |
| med.care.12m          | -0.97                                 | (-2.31 ; 0.36)  | 0.83                |                                       |                 | 0.24                |
| detox_1               | -2.92                                 | (-4.79 ; -1.05) | 0.99                | -0.74                                 | (-2.32 ; 0.84)  | 0.79                |
| detox_2               | -2.05                                 | (-3.72 ; -0.38) | 0.97                |                                       |                 | 0.48                |
| drug.treat.problems_1 | 0.34                                  | (-0.77 ; 1.46)  | 0.71                |                                       |                 | 0.13                |
| drug.treat.problems_2 | -1.00                                 | (-2.59 ; 0.6)   | 0.73                |                                       |                 | 0.25                |
| med.care.problems     | -1.75                                 | (-3.44 ; -0.06) | 0.94                |                                       |                 | 0.40                |
| police.confiscate.syr | -0.15                                 | (-1.25 ; 0.95)  | 0.65                |                                       |                 | 0.14                |
| IDU.disclosure.close  | -0.67                                 | (-1.95 ; 0.61)  | 0.72                |                                       |                 | 0.23                |
| IDU.disclosure.doctor |                                       |                 | 0.58                |                                       |                 | 0.09                |
| IDU.stigma.internal   | -3.22                                 | (-4.73 ; -1.7)  | 1.00                | -3.30                                 | (-4.86 ; -1.74) | 0.98                |
| IDU.stigma.conscious  | 0.54                                  | (-0.72 ; 1.8)   | 0.76                |                                       |                 | 0.14                |
